# Supplementary material
Source: publisher figshare collection journal article supplement (https://gsapubs.figshare.com/ndownloader/files/22411062)
Supplement: Supplementary file 1 [file 22411062]

## Sheet: SB.u
Supplemental File 2: Alteration, mass analysis and magmatic compositions of the Sentinel Bluffs Member, Columbia River flood basalt province, by M. G. Sawlan
Unnormalized Major and Trace element Abundances															Major elements (wt. %)											Trace elements (ppm)
Chem_ID_field	Chem_ID_lab	Section_ID	SB_Sec_Flow	SB_Series	SB_Group	Sample_type	Site_context	Coll._By	Long_NAD83	Lat_NAD83	Chem_prep_type	XRF_Prep_by	XRF_date_time	MIs	SiO2	TiO2	Al2O3	FeO	MnO	MgO	CaO	Na2O	K2O	P2O5		Ni	Cr	Sc	V	Ba	Rb	Sr	Zr	Y	Nb	Ga	Cu	Zn	Pb	La	Ce	Th	Nd	U		Total.M-ox	Total_Tr-ox	Total_M+Tr-ox
080721-1914MS	10MS027	Armstrong Cyn	AC-1	3	9	interrind	roadcut	Sawlan	-120.368	45.1423	chipped	Sawlan	2010-04-22 13:47:28	99.1523	53.3662	1.86182	14.0055	11.4638	0.202592	4.96062	8.72194	2.91474	1.17826	0.297146		17.6	38.1	38.4	328.9	465.2	26.1	316.8	159.3	33.4	11.4	21.5	32.9	119.2	4.4	17	40.7	3	21.7	0.4		98.9726	0.213963	99.1866
080721-1807MS	10MS028	Armstrong Cyn	AC-1	3	9	interrind	outcrop	Sawlan	-120.368	45.1425	chipped	Sawlan	2010-04-22 14:53:34	99.5376	53.4704	1.84135	14.0506	11.7202	0.204003	5.02658	8.75	2.9476	1.121	0.294738		17.6	39.4	37.9	329	466.3	26.6	320	158	34.2	11.7	21.2	31.7	116.6	5.2	19.5	37.3	2.5	21.5	0.4		99.4264	0.213983	99.6404
080721-1701MS	10MS029	Armstrong Cyn	AC-2	3	9	interrind	outcrop	Sawlan	-120.367	45.1427	chipped	Sawlan	2010-04-22 15:59:34	97.0855	52.9738	1.82495	14.1874	10.5283	0.18754	4.72887	9.00465	2.83294	1.04753	0.28399		20.8	39.6	36.9	328.5	448.6	22.1	330	154.1	32.3	11.1	21.7	31.2	117.3	5.5	21.7	41.3	3.4	23.8	1.2		97.6	0.213385	97.8134
CB0119	10MS173	Bingen	BG-01	1	1	interrind	outcrop	Sawlan	-121.417	45.6999	sawn	Sawlan	2011-11-12 13:35:06	99.5353	54.0712	2.05249	13.7705	12.5075	0.209009	4.42685	8.21838	3.03716	1.16404	0.332353		11.286	16.632	35.64	350.064	513.117	30.987	323.334	167.904	33.957	12.276	19.998	26.829	125.532	5.742	21.087	41.085	5.346	24.651	2.178		99.7895	0.222031	100.012
100514-1258MS	10MS174	Bingen	BG-02	1	2	interseam	outcrop	Sawlan	-121.414	45.6996	chipped	Sawlan	2011-11-12 14:41:16	99.8727	53.3515	1.95005	13.742	12.2574	0.207227	4.68323	8.5033	2.96258	1.04031	0.294693		12.375	20.493	37.62	332.442	468.27	24.552	320.166	160.776	33.363	11.187	20.691	26.928	118.998	5.643	20.493	45.54	3.762	25.938	1.683		98.9923	0.21284	99.2051
100514-1258MS-a	10MS175	Bingen	BG-02	1	2	hyd. seam	outcrop	Sawlan	-121.414	45.6996	chipped	Sawlan	2011-11-12 15:47:24	100.006	53.706	1.95052	13.8105	12.3194	0.206445	4.70028	8.54626	2.94749	1.04989	0.293822		12.573	19.8	36.333	335.016	474.804	25.146	322.641	161.172	33.66	11.088	22.077	27.324	119.691	5.94	17.424	43.164	3.069	22.671	0.891		99.5306	0.213265	99.7439
100514-1106MS	10MS178	Bingen	BG-03	1	2	interseam	outcrop	Sawlan	-121.413	45.6997	chipped	Sawlan	2011-11-12 19:05:40	99.7327	53.1367	1.927	13.6983	12.2171	0.205682	4.55679	8.37711	2.82839	1.13043	0.302336		12.276	18.414	35.739	330.561	450.945	29.601	320.265	159.39	33.363	11.187	20.691	26.334	118.8	5.247	20.79	45.837	3.96	24.057	2.97		98.3798	0.210275	98.5901
100514-1106MS-a	10MS259	Bingen	BG-03	1	2	hyd. seam	outcrop	Sawlan	-121.413	45.6997	chipped	Sawlan	2011-11-13 21:32:34	99.7315	53.1347	1.92744	13.6967	12.1985	0.206227	4.57925	8.39556	2.82892	1.10543	0.301643		12.969	20.295	35.541	333.036	450.846	29.997	320.463	158.499	34.056	12.177	20.79	24.057	118.008	4.455	19.404	39.402	4.851	23.562	1.188		98.3744	0.209576	98.584
100813-1501MS	10MS176	Bingen	BG-04	2	4	interseam	outcrop	Sawlan	-121.413	45.6996	chipped	Sawlan	2011-11-12 16:53:30	99.7157	53.2454	2.03058	13.654	12.5273	0.211256	4.57136	8.33105	2.87457	1.28798	0.349708		14.355	32.274	35.541	319.968	497.475	30.789	312.642	171.369	36.135	11.979	20.79	27.918	126.72	5.742	23.265	41.382	3.96	25.641	2.772		99.0831	0.218641	99.3018
100813-1501MS-a	10MS177	Bingen	BG-04	2	4	hyd. seam	outcrop	Sawlan	-121.413	45.6996	chipped	Sawlan	2011-11-12 17:59:36	99.8247	53.2014	2.02401	13.6188	12.4854	0.210405	4.58258	8.36108	2.86315	1.23269	0.344609		14.85	33.165	35.541	319.275	489.852	29.799	314.622	169.785	35.739	11.682	21.285	27.324	123.156	4.752	20.097	46.233	3.96	26.73	1.188		98.9242	0.217319	99.1415
100813-1501MS-b	10MS258	Bingen	BG-04	2	4	inner rind-sec. min.	outcrop	Sawlan	-121.413	45.6996	chipped	Sawlan	2011-11-13 20:26:24	99.8899	52.9706	1.99898	13.5741	12.4215	0.208355	4.5845	8.32934	2.84868	1.20932	0.342075		14.157	31.977	37.323	320.562	483.912	29.007	312.741	168.201	34.947	12.474	20.889	27.72	123.453	6.138	22.968	48.609	4.554	26.136	3.168		98.4875	0.217374	98.7049
100512-1730MS	10MS179	Bingen	BG-05	2	5	interseam	roadcut	Sawlan	-121.411	45.6992	chipped	Sawlan	2011-11-12 20:11:42	99.5534	52.9452	1.94791	13.7387	12.2018	0.208306	4.7797	8.53812	2.82765	1.12337	0.324581		15.84	37.224	37.521	319.176	460.944	27.423	314.127	160.875	35.343	10.989	21.186	30.888	122.364	3.663	19.008	42.075	4.158	24.453	1.584		98.6354	0.212807	98.8482
100512-1624MS	10MS180	Bingen	BG-06	2	5	interseam	roadcut	Sawlan	-121.411	45.6992	chipped	Sawlan	2011-11-12 21:17:50	99.7488	52.4468	1.95424	13.5674	12.2675	0.207484	4.73478	8.42262	2.91838	1.03851	0.326561		15.048	36.036	36.531	318.582	486.684	25.938	311.256	162.657	35.145	11.187	20.097	28.314	119.592	5.544	21.879	45.045	3.465	24.75	1.188		97.8842	0.214912	98.0991
100512-1624MS-a	10MS260	Bingen	BG-06	2	5	hyd. seam	roadcut	Sawlan	-121.411	45.6992	chipped	Sawlan	2011-11-13 22:38:40	99.9194	52.8361	1.9579	13.6661	12.4335	0.209187	4.7639	8.49279	2.92717	1.04797	0.330789		16.038	37.026	37.422	320.859	490.842	25.74	311.058	163.647	34.155	11.286	20.988	29.304	121.077	6.435	16.929	39.402	3.564	26.235	1.584		98.6654	0.215575	98.881
100512-1349MS	10MS181	Bingen	BG-07	3	8	interseam	roadcut	Sawlan	-121.41	45.6991	chipped	Sawlan	2011-11-12 22:23:52	99.8129	53.1722	1.86051	13.8856	12.0233	0.204029	4.91579	8.65574	2.83175	1.06933	0.305851		15.444	34.155	37.125	310.167	453.519	25.839	317.889	157.014	33.264	10.89	20.592	28.215	117.513	3.762	17.325	41.679	3.465	22.077	1.782		98.9241	0.207977	99.1321
100512-1349MS-a	10MS261	Bingen	BG-07	3	8	hyd. seam	roadcut	Sawlan	-121.41	45.6991	chipped	Sawlan	2011-11-14 01:57:04	99.2882	52.9183	1.85349	13.8711	11.7256	0.20197	4.86515	8.62903	2.81798	1.06368	0.306148		16.83	34.452	36.729	308.484	452.529	26.631	315.909	155.034	33.462	10.692	21.78	28.611	118.701	4.653	16.929	41.481	2.871	22.473	0.99		98.2525	0.207634	98.4601
100512-1349MS-b	10MS262	Bingen	BG-07	3	8	interrind	roadcut	Sawlan	-121.41	45.6991	chipped	Sawlan	2011-11-14 03:03:14	99.403	52.9267	1.85217	13.8527	11.6717	0.202732	4.90798	8.62403	2.83607	1.06487	0.305266		15.642	34.749	35.937	311.949	456.588	26.532	314.919	155.331	33.165	10.989	20.295	28.017	118.107	5.643	21.186	45.144	4.158	25.542	2.376		98.2443	0.209649	98.454
100512-1256MS	10MS182	Bingen	BG-08	3	8	interseam	roadcut	Sawlan	-121.41	45.6991	chipped	Sawlan	2011-11-12 23:29:58	99.6456	52.7834	1.85663	13.8265	11.921	0.201712	4.96955	8.71148	2.83239	0.981555	0.291228		16.731	36.531	37.224	311.355	456.192	22.968	312.246	156.618	33.561	11.088	20.196	29.997	114.543	4.95	17.226	39.996	2.574	24.552	1.287		98.3754	0.207851	98.5832
100512-1256MS-a	10MS263	Bingen	BG-08	3	8	hyd. seam	roadcut	Sawlan	-121.41	45.6991	chipped	Sawlan	2011-11-14 04:09:24	99.5788	52.4606	1.84066	13.7151	11.5503	0.200693	4.95446	8.66968	2.83831	0.986327	0.289684		17.127	35.937	37.62	317.196	449.163	23.859	308.682	154.44	33.363	10.989	20.097	30.69	115.137	5.841	19.305	42.57	2.178	23.067	2.376		97.5059	0.207997	97.7139
100512-1051MS	10MS183	Bingen	BG-09	4	10	interseam	roadcut	Sawlan	-121.409	45.699	chipped	Sawlan	2011-11-13 00:36:04	100.357	53.1153	1.80292	13.8616	12.063	0.191931	4.96311	8.58806	2.89237	1.00012	0.285971		18.81	42.966	35.739	321.75	479.259	23.958	309.276	157.311	32.769	11.088	19.404	35.244	113.85	5.841	20.493	41.382	4.356	21.681	1.881		98.7644	0.213729	98.9781
100512-1051MS-a	10MS264	Bingen	BG-09	4	10	hyd. seam	roadcut	Sawlan	-121.409	45.699	chipped	Sawlan	2011-11-14 05:15:30	99.4945	53.1907	1.80296	13.9087	11.4531	0.184694	4.90483	8.52033	2.91089	1.02437	0.287981		18.315	42.867	35.343	321.552	480.15	23.166	307.395	158.4	32.373	11.583	20.295	37.026	114.444	5.94	19.107	45.144	4.653	23.958	0		98.1886	0.214339	98.4029
100512-1051MS-b	10MS265	Bingen	BG-09	4	10	interrind	roadcut	Sawlan	-121.409	45.699	chipped	Sawlan	2011-11-14 06:21:42	99.995	52.5274	1.7724	13.7343	11.6122	0.19009	4.92624	8.4948	2.85817	0.975645	0.281724		17.226	42.075	35.046	314.919	464.607	22.176	303.831	154.341	31.977	11.187	19.107	35.244	112.068	6.633	16.335	41.679	3.762	24.552	0.297		97.373	0.208789	97.5818
100511-1800MS	10MS184	Bingen	BG-10	4	12	interseam	roadcut	Sawlan	-121.408	45.6991	chipped	Sawlan	2011-11-13 01:42:12	99.3894	53.2567	1.7878	13.98	11.4605	0.193545	4.84293	8.65815	2.72764	1.16659	0.285843		18.711	40.788	35.145	322.542	449.856	28.809	313.038	155.529	32.373	11.088	19.305	34.254	115.929	4.653	21.978	43.362	4.554	24.057	1.485		98.3597	0.211492	98.5712
100511-1800MS-a	10MS266	Bingen	BG-10	4	12	interrind	roadcut	Sawlan	-121.408	45.6991	chipped	Sawlan	2011-11-14 07:27:48	99.5887	53.1061	1.77532	13.9364	11.5677	0.193773	4.81331	8.62977	2.73141	1.14366	0.286496		18.216	43.164	35.64	324.621	447.777	29.106	311.553	156.024	32.076	11.187	20.493	32.868	112.167	5.544	19.503	43.659	3.96	24.948	1.386		98.184	0.211212	98.3952
100511-1303MS	10MS185	Bingen	BG-11	5	15	interseam	outcrop	Sawlan	-121.407	45.6993	chipped	Sawlan	2011-11-13 02:48:18	99.1903	54.297	1.75867	14.2027	11.2352	0.191803	4.67869	8.53636	2.94572	1.25917	0.320988		15.642	39.006	35.739	307.692	538.758	31.878	320.067	165.429	33.858	11.286	20.394	28.512	117.711	7.128	19.206	45.441	4.752	24.156	0		99.4263	0.221112	99.6474
100511-1303MS-a	10MS267	Bingen	BG-11	5	15	hyd. seam	outcrop	Sawlan	-121.407	45.6993	chipped	Sawlan	2011-11-14 08:33:54	98.8868	53.771	1.74169	14.1011	10.9892	0.189347	4.64372	8.45481	2.9311	1.23843	0.317364		14.949	38.214	34.353	304.524	531.63	31.383	315.612	161.469	33.66	11.385	20.691	27.918	114.246	7.821	22.176	44.253	4.356	26.829	3.366		98.3778	0.218755	98.5965
100511-1401MS	10MS186	Bingen	BG-12	5	15	interseam	outcrop	Sawlan	-121.407	45.6993	chipped	Sawlan	2011-11-13 03:54:28	100.042	54.1227	1.74242	14.0945	11.5129	0.196287	4.85703	8.4911	2.95884	1.2043	0.316216		15.84	38.313	35.838	307.791	530.145	30.492	316.899	161.073	33.264	10.494	20.889	27.621	115.929	4.554	20.691	45.441	5.049	21.186	1.485		99.4962	0.218281	99.7145
100511-1620MS	10MS187	Bingen	BG-13	5	15	interseam	outcrop	Sawlan	-121.407	45.6996	chipped	Sawlan	2011-11-13 05:00:34	98.9869	53.9285	1.74694	14.1648	11.0488	0.189724	4.78314	8.59316	2.92003	1.21643	0.31087		15.345	39.402	35.145	307.494	534.501	30.393	319.869	160.677	33.264	10.494	21.582	27.918	115.335	5.247	19.008	41.283	4.455	24.651	3.168		98.9024	0.218946	99.1213
110427-1738MS	10MS147	Butler Cyn	BL-1	2	5	interseam	roadcut	Sawlan	-121.153	45.3018	chipped	Sawlan	2011-11-03 21:53:02	98.3624	53.4579	2.01145	13.8419	11.7402	0.204653	4.28408	8.53817	2.87571	1.34492	0.33959		16.038	37.422	36.63	325.809	496.683	30.492	316.206	169.884	36.135	12.276	20.889	30.591	123.948	4.95	19.305	45.54	3.861	26.928	1.485		98.6386	0.220737	98.8594
110427-1738MS-a	10MS320	Butler Cyn	BL-1	2	5	hyd. seam	roadcut	Sawlan	-121.153	45.3018	chipped	Sawlan	2011-11-04 21:13:38	98.3057	53.2106	1.99575	13.8069	11.6893	0.203643	4.2911	8.50932	2.85816	1.32658	0.340847		15.642	38.115	36.234	322.74	498.96	30.987	315.018	168.102	36.135	11.88	20.097	31.086	124.245	5.643	22.572	46.53	3.168	27.027	2.475		98.2322	0.22076	98.453
100924-1440MS	10MS139	Butler Cyn	BL-2	2	6	interseam	roadcut	Sawlan	-121.151	45.3028	chipped	Sawlan	2011-10-31 10:10:12	99.781	53.2291	1.91749	13.8731	12.237	0.208157	4.83124	8.53825	2.87844	1.315	0.328848		16.731	39.501	36.63	318.78	481.932	28.611	317.097	162.657	34.353	11.583	20.097	29.304	121.374	5.148	18.513	37.521	3.366	21.879	0.594		99.3567	0.214658	99.5714
100924-1440MS-a	10MS310	Butler Cyn	BL-2	2	6	hyd. seam	roadcut	Sawlan	-121.151	45.3028	chipped	Sawlan	2011-11-04 08:53:48	99.8554	53.1751	1.91323	13.8398	12.2467	0.209514	4.80624	8.53314	2.82605	1.31586	0.328383		16.632	41.481	36.432	314.523	476.784	29.601	316.206	161.37	34.848	10.692	20.493	29.898	120.78	5.841	21.384	45.342	3.267	26.631	2.178		99.194	0.215611	99.4097
100924-1559MS	10MS140	Butler Cyn	BL-3	3	7	interseam	roadcut	Sawlan	-121.149	45.3042	chipped	Sawlan	2011-10-31 11:16:14	100.011	53.1478	1.9165	13.7265	12.2229	0.19404	4.8043	8.28749	3.0175	1.08784	0.315384		13.266	31.779	36.432	311.85	484.209	27.72	304.425	162.261	34.353	11.979	20.493	27.918	117.018	5.346	18.117	40.689	2.772	22.077	2.673		98.7202	0.210586	98.9308
100924-1559MS-a	10MS311	Butler Cyn	BL-3	3	7	hyd. seam	roadcut	Sawlan	-121.149	45.3042	chipped	Sawlan	2011-11-04 09:59:54	100.059	52.8239	1.91075	13.5997	12.0324	0.192466	4.7713	8.25511	2.97848	1.08845	0.313147		15.543	32.67	36.531	314.127	487.377	27.522	302.841	161.766	33.858	11.286	21.186	29.799	118.503	6.336	18.711	42.966	2.475	25.839	0.99		97.9657	0.212461	98.1781
100924-1559MS-b	10MS312	Butler Cyn	BL-3	3	7	interrind	roadcut	Sawlan	-121.149	45.3042	chipped	Sawlan	2011-11-04 11:06:00	99.6286	52.7622	1.90572	13.6588	11.9407	0.192426	4.77048	8.24158	2.97393	1.08384	0.312493		15.741	32.769	35.937	314.919	481.338	26.829	303.138	161.073	35.145	11.682	19.701	29.601	119.097	4.752	17.523	40.194	3.663	24.057	0		97.8421	0.210955	98.0531
100924-1742MS	10MS141	Butler Cyn	BL-4	3	8	interseam	roadcut	Sawlan	-121.148	45.3067	chipped	Sawlan	2011-10-31 12:22:16	99.8844	52.8895	1.84508	13.7445	11.8624	0.194515	4.77891	8.50586	2.95187	0.955498	0.292189		14.355	35.343	37.224	314.226	460.35	21.582	309.474	158.004	33.066	11.979	20.493	32.868	115.83	3.762	18.117	38.61	3.267	22.473	0.99		98.0203	0.208203	98.2285
100924-1742MS-a	10MS313	Butler Cyn	BL-4	3	8	hyd. seam	roadcut	Sawlan	-121.148	45.3067	chipped	Sawlan	2011-11-04 13:31:02	99.6143	52.8801	1.85	13.7059	11.5056	0.190595	4.75414	8.49522	2.93773	0.965893	0.289654		15.741	35.145	37.125	318.78	456.885	22.77	308.979	156.717	32.67	11.286	19.998	32.769	114.84	4.95	21.285	42.768	3.465	23.265	0.891		97.5749	0.209279	97.7841
100925-1125MS	10MS142	Butler Cyn	BL-5	3	9	interseam	roadcut	Sawlan	-121.148	45.3082	chipped	Sawlan	2011-10-31 13:28:22	100.041	52.9535	1.79252	13.9499	11.7972	0.201703	5.16439	8.77868	2.85291	1.1098	0.277448		14.949	39.699	37.224	322.047	446.985	26.037	313.236	151.569	31.68	10.494	19.998	32.472	114.444	4.356	20.592	36.135	3.168	20.196	2.277		98.878	0.207874	99.0859
100925-1125MS-a	10MS314	Butler Cyn	BL-5	3	9	hyd. seam	roadcut	Sawlan	-121.148	45.3082	chipped	Sawlan	2011-11-04 14:37:08	100.06	52.941	1.80239	13.8913	11.6634	0.201188	5.16153	8.78789	2.81294	1.10998	0.277279		17.028	40.392	36.729	319.572	442.134	25.047	314.82	151.074	32.076	11.187	20.196	30.987	110.682	5.841	14.85	36.333	3.465	20.196	0		98.6489	0.206087	98.855
100925-1302MS	10MS143	Butler Cyn	BL-6	5	15	interseam	roadcut	Sawlan	-121.147	45.3123	chipped	Sawlan	2011-10-31 14:34:24	94.0032	54.931	1.82491	14.8637	8.82889	0.167686	4.38588	8.77356	2.91158	1.46407	0.325393		10.989	39.402	36.432	310.068	626.571	34.848	338.976	169.785	37.026	11.286	21.582	26.829	120.681	7.326	23.364	50.787	3.96	28.611	1.188		98.4766	0.236434	98.7131
100925-1302MS-a	10MS315	Butler Cyn	BL-6	5	15	hyd. seam	roadcut	Sawlan	-121.147	45.3123	chipped	Sawlan	2011-11-04 15:43:14	94.1614	54.6972	1.80911	14.7587	8.74368	0.163152	4.37425	8.73687	2.87534	1.44252	0.321968		13.86	42.669	36.432	302.544	628.254	34.947	340.857	169.29	37.323	11.781	21.384	28.413	123.057	5.544	20.691	44.352	4.356	24.057	1.881		97.9228	0.235395	98.1582
100930-1545MS	10MS144	Butler Cyn	BL-8	5	15	interseam	roadcut	Sawlan	-121.147	45.3155	sawn	Sawlan	2011-10-31 16:48:06	98.7662	53.602	1.74859	14.1136	10.889	0.196763	4.66088	8.57169	2.86432	1.42102	0.320077		12.177	36.135	36.234	303.039	533.61	33.66	317.295	164.835	33.066	10.692	19.503	28.314	115.533	6.831	21.483	45.738	3.366	24.948	2.673		98.388	0.218754	98.6067
100930-1545MS-a	10MS145	Butler Cyn	BL-8	5	15	inner rind-sec. min.	roadcut	Sawlan	-121.147	45.3155	chipped	Sawlan	2011-10-31 17:54:08	98.272	54.0661	1.77093	14.2529	10.7198	0.195347	4.64638	8.5779	2.89559	1.44844	0.326868		14.454	37.422	35.64	309.969	540.045	33.264	320.859	167.112	33.66	12.078	19.404	26.829	116.919	6.138	24.156	43.56	5.049	24.651	0.198		98.9004	0.221667	99.122
100930-1545MS-b	10MS316	Butler Cyn	BL-8	5	15	hyd. seam	roadcut	Sawlan	-121.147	45.3155	chipped	Sawlan	2011-11-04 16:49:22	98.6993	53.4275	1.74463	14.0898	10.9241	0.199396	4.64942	8.54131	2.83535	1.41558	0.319245		15.84	38.61	36.036	302.841	533.016	33.462	317.889	163.647	33.264	11.583	20.196	28.908	116.82	5.148	18.216	46.926	4.455	24.651	1.98		98.1463	0.219419	98.3658
070921-1455-MS	07MS023	Chapman-Trenholm	CT-1	1	2	interrind	quarry	Sawlan	-122.977	45.9125	chipped	Sawlan	2013-06-04 01:39:44	95.7287	54.4884	2.01694	14.2851	9.73751	0.200618	4.44315	8.5955	3.03527	1.40438	0.314744		13.9167	21.4179	37.3086	348.806	530.118	32.7684	339.232	166.309	39.0852	11.5479	22.2075	28.5243	148.149	6.909	20.5296	50.4357	3.4545	26.3529	1.6779		98.5216	0.231903	98.7535
070913-1726-MS	07MS009	Chapman-Trenholm	CT-2	3	7	interrind	roadcut	Sawlan	-122.952	45.8631	chipped	Sawlan	2013-06-03 05:22:52	90.9748	54.4294	2.12722	14.7741	8.8277	0.202256	3.89191	8.38629	2.91144	1.29094	0.340949		21.1218	35.2359	39.7761	340.712	563.774	30.2022	334.692	179.338	43.5267	12.6336	23.0958	29.5113	137.094	5.3298	25.5633	50.7318	3.8493	26.8464	0.7896		97.1822	0.238775	97.421
070915-1604-MS-a	07MS010	Chapman-Trenholm	CT-3a	3	7	str. weathered	quarry	Sawlan	-122.953	45.8693	chipped	Sawlan	2013-06-03 06:29:00	53.2172	34.9011	2.76079	19.3399	15.8479	0.0428259	0.664498	0.427065	0.0346733	0.0472378	0.182871		15.4959	43.1319	48.1656	322.157	614.309	4.7376	25.7607	227.997	88.83	15.5946	29.3139	38.7891	200.065	5.4285	46.0929	20.5296	5.1324	58.6278	1.2831		74.2489	0.229293	74.4781
070915-1604-MS-c	07MS012	Chapman-Trenholm	CT-3b	3	7	interrind	quarry	Sawlan	-122.953	45.8693	chipped	Sawlan	2013-06-03 08:41:12	92.0356	54.6719	2.09652	14.6896	8.75812	0.173969	3.74737	8.61095	3.03524	1.42406	0.351323		12.0414	34.9398	39.2826	335.777	850.399	36.8151	360.65	175.785	38.9865	12.2388	23.9841	33.2619	133.738	4.7376	25.4646	44.9085	3.1584	27.5373	1.8753		97.5591	0.270958	97.8301
070915-1822-MS	07MS014	Chapman-Trenholm	CT-3c	3	7	interrind	quarry	Sawlan	-122.954	45.8686	chipped	Sawlan	2013-06-03 10:53:22	96.8071	53.8083	2.04333	14.0626	10.9639	0.210952	4.017	8.7285	2.99326	1.43462	0.346891		12.9297	33.6567	38.0982	326.796	617.566	31.4853	329.362	172.33	36.9138	12.4362	20.3322	30.597	128.803	5.8233	20.8257	45.8955	3.2571	23.2932	1.7766		98.6094	0.236161	98.8456
070915-1604-MS-d	07MS013	Chapman-Trenholm	CT-3d	3	7	alt. rind	quarry	Sawlan	-122.953	45.8693	chipped	Sawlan	2013-06-03 09:47:14	98.8337	52.7778	1.96216	13.6596	11.9112	0.196383	4.36249	8.3524	2.82839	1.21144	0.328543		17.766	32.7684	36.9138	316.136	501.396	28.1295	312.78	163.743	36.3216	11.2518	21.0231	43.1319	125.053	4.4415	20.3322	40.1709	3.6519	25.3659	0.3948		97.5904	0.218613	97.809
070915-1604-MS-b	07MS011	Chapman-Trenholm	CT-3e	3	7	interrind	quarry	Sawlan	-122.953	45.8693	chipped	Sawlan	2013-06-03 07:35:06	99.2073	52.571	1.95199	13.5334	12.1287	0.193018	4.27227	8.27187	2.78161	1.0874	0.326904		13.4232	33.558	37.6047	318.9	581.146	30.9918	317.715	164.237	43.3293	11.0544	21.3192	29.8074	129.396	5.4285	22.701	44.415	2.6649	26.649	1.974		97.1181	0.229447	97.3476
070919-1825-MS	07MS022	Chapman-Trenholm	CT-4	3	7	interrind	quarry	Sawlan	-122.938	45.8891	chipped	Sawlan	2013-06-04 00:33:40	98.4487	52.3896	1.97257	13.6603	12.0905	0.202878	4.41459	8.4374	2.78872	1.00687	0.333231		16.0881	29.7087	37.1112	322.157	588.943	26.3529	327.092	165.717	56.7525	11.5479	19.5426	29.61	129.1	4.6389	26.2542	45.6981	3.8493	30.1035	1.0857		97.2967	0.233703	97.5304
070919-1453-MS	07MS021	Chapman-Trenholm	CT-5	3	7	interrind	roadcut	Sawlan	-122.93	45.8997	chipped	Sawlan	2013-06-03 23:27:38	98.2831	53.4066	2.00821	13.9009	11.6076	0.204625	4.43438	8.61329	2.99424	1.35316	0.343535		14.3115	33.6567	37.7034	327.388	519.557	30.4983	317.814	168.284	36.6177	11.9427	20.9244	30.597	125.349	4.4415	20.3322	44.6124	3.6519	26.649	1.2831		98.8665	0.222959	99.0894
070917-1630-MS	07MS016	Chapman-Trenholm	CT-6	3	7	interrind	quarry	Sawlan	-122.917	45.9198	chipped	Sawlan	2013-06-03 13:05:32	99.9592	53.1484	1.96977	13.6934	12.2193	0.212096	4.7089	8.43516	2.97949	1.27561	0.335906		14.4102	33.0645	37.7034	317.518	496.461	28.5243	309.721	165.52	35.3346	11.5479	21.9114	28.623	122.191	5.3298	19.5426	43.9215	3.948	24.3789	1.0857		98.978	0.216247	99.1942
070916-1811-MS	07MS015	Chapman-Trenholm	CT-7	3	7	interrind	roadcut	Sawlan	-122.936	45.8943	chipped	Sawlan	2013-06-03 11:59:24	100.079	52.9421	1.92301	13.5878	11.9724	0.211741	4.63507	8.38103	3.03187	1.02501	0.323371		15.792	30.2022	36.8151	312.484	489.157	22.5036	307.45	161.868	35.3346	11.1531	20.3322	28.5243	118.637	5.922	19.8387	44.8098	2.2701	20.5296	1.0857		98.0334	0.211736	98.2451
070908-1545-MS	07MS001	Chapman-Trenholm	CT-8	5	13	interrind	roadcut	Sawlan	-122.954	45.9307	chipped	Sawlan	2013-06-02 20:33:58	96.0728	55.0938	1.86588	14.5073	9.66634	0.187737	4.20455	8.48136	3.00994	1.51713	0.354846		9.1791	37.3086	35.6307	310.905	628.916	36.519	327.289	172.528	37.2099	11.1531	21.5166	28.7217	125.25	6.4155	25.4646	49.7448	3.6519	25.0698	1.2831		98.8889	0.235715	99.1246
090921-1102MS	10MS071	Devils Hole	DH-1	1	1	interseam	roadcut	Sawlan	-121.208	45.6698	chipped	Sawlan	2011-10-24 05:09:48	100.002	53.1242	2.04572	13.4475	12.4814	0.210622	4.32144	8.03158	3.02428	1.27557	0.335937		10.692	17.226	34.056	344.223	514.602	32.67	320.958	167.706	34.65	12.276	20.988	23.661	124.146	6.534	21.186	47.421	5.049	24.75	1.782		98.2983	0.221444	98.5197
090921-1102MS-a	10MS079	Devils Hole	DH-1	1	1	hyd. seam	roadcut	Sawlan	-121.208	45.6698	chipped	Sawlan	2011-10-24 13:58:22	99.8624	52.9976	2.04058	13.4153	12.3452	0.209395	4.29596	8.00941	3.00518	1.26648	0.337768		10.692	16.038	36.333	343.134	512.622	33.363	320.166	167.409	34.749	12.177	20.394	24.453	125.433	5.544	23.265	44.352	4.554	23.76	3.366		97.9229	0.221121	98.144
090921-1238MS	10MS072	Devils Hole	DH-2	1	2	interseam	roadcut	Sawlan	-121.208	45.6697	chipped	Sawlan	2011-10-24 06:15:54	100.119	53.2085	2.00057	13.5534	12.368	0.207841	4.49095	8.22181	2.93188	1.30447	0.320225		11.484	18.414	36.432	340.263	490.347	34.155	319.473	165.429	33.957	12.177	20.196	24.651	125.235	4.95	20.691	41.877	4.851	22.473	1.98		98.6076	0.217346	98.8249
090921-1238MS-a	10MS080	Devils Hole	DH-2	1	2	hyd. seam	roadcut	Sawlan	-121.208	45.6697	chipped	Sawlan	2011-10-24 15:04:26	100.239	53.2841	1.99964	13.5746	12.5074	0.208395	4.51027	8.20667	2.93484	1.29642	0.319968		10.89	18.513	36.432	337.887	482.724	34.65	319.275	164.835	33.363	12.177	21.483	25.245	123.849	6.039	19.008	48.213	4.554	23.76	1.881		98.8423	0.216838	99.0592
090921-1554MS	10MS073	Devils Hole	DH-3	3	8	interseam	roadcut	Sawlan	-121.207	45.6689	chipped	Sawlan	2011-10-24 07:21:58	100.155	52.12	1.82914	13.6049	11.8903	0.202108	4.90974	8.61134	2.80086	1.05307	0.291585		16.335	35.838	35.442	314.424	446.787	26.136	309.771	158.004	33.066	11.682	19.899	32.373	118.008	4.554	19.404	39.897	3.366	22.77	1.386		97.3131	0.207873	97.521
090921-1554MS-a	10MS331	Devils Hole	DH-3	3	8	hyd. seam	roadcut	Sawlan	-121.207	45.6689	chipped	Sawlan	2011-10-24 16:10:32	100.164	52.6389	1.85068	13.7329	11.9989	0.203514	4.96471	8.72411	2.81459	1.05816	0.294347		15.048	36.729	36.63	312.84	448.668	26.532	310.464	159.984	33.165	11.088	19.998	32.076	116.523	4.851	18.711	36.333	3.861	23.463	1.485		98.2809	0.207771	98.4886
090921-1719MS	10MS074	Devils Hole	DH-4	4	12	interseam	roadcut	Sawlan	-121.206	45.6677	chipped	Sawlan	2011-10-24 08:28:02	98.6235	52.2938	1.74169	13.932	11.0597	0.185536	4.82026	8.75049	2.82305	1.00043	0.280863		17.226	41.481	36.135	322.146	457.677	25.047	321.651	151.569	32.373	10.593	19.404	29.898	115.731	6.039	18.117	42.669	5.049	20.196	0		96.8879	0.21087	97.0988
090921-1819MS	10MS075	Devils Hole	DH-5	5	16	interseam	roadcut	Sawlan	-121.205	45.667	chipped	Sawlan	2011-10-24 09:34:10	100.025	53.0786	1.69765	13.9823	11.5385	0.198356	5.01193	8.57321	2.94184	1.114	0.30491		15.642	40.59	35.046	299.673	507.573	27.918	314.028	155.925	32.076	10.593	19.899	26.334	115.236	4.752	17.127	44.55	3.366	23.166	1.485		98.4413	0.212453	98.6538
090921-1819MS-a	10MS332	Devils Hole	DH-5	5	16	hyd. seam	roadcut	Sawlan	-121.205	45.667	chipped	Sawlan	2011-10-24 17:16:38	99.8995	53.2929	1.70358	14.055	11.5588	0.199228	5.00086	8.62256	2.94624	1.119	0.30688		14.553	40.095	33.858	299.277	518.166	28.017	315.513	157.113	32.967	10.989	21.087	27.027	114.048	5.346	19.107	43.362	2.97	24.75	0.792		98.805	0.214013	99.019
080531-1610MS	08MS018	Patrick Grade	PG-1	1	3	interrind	roadcut	Sawlan	-117.754	46.2495	chipped	Sawlan	2009-10-01 05:30:06	98.5416	53.0532	1.89327	13.8929	11.4766	0.18718	4.6511	8.73976	2.85147	0.99058	0.2737		14.6	24.9	37.2	331.6	454.9	25.3	322.9	153.2	35.2	11.7	21	32.2	115	6.6	18.4	40.7	3.6	22.1	2.3		98.0097	0.210844	98.2206
090616-1816MS-a	10MS042	Patrick Grade	PG-2	1	3	interrind	roadcut	Sawlan	-117.753	46.2492	chipped	Sawlan	2010-04-16 17:15:36	96.692	54.6962	1.93062	14.3004	9.41247	0.19464	4.83444	8.92901	2.87977	1.33145	0.29007		14.9	28	37.8	330.3	641	29.2	337.1	162.4	36.9	13.3	21.3	32.8	119.9	6.9	18.6	42.6	2.7	21.4	0.6		98.7991	0.236451	99.0355
090616-1816MS-b	10MS043	Patrick Grade	PG-2	1	3	interrind	roadcut	Sawlan	-117.753	46.2492	chipped	Sawlan	2010-04-16 18:21:34	97.3146	54.3255	1.9067	14.2442	10.2438	0.19083	4.66727	8.89851	2.86336	1.28511	0.2818		16.7	27.5	37.9	335.7	517.9	28.9	332.4	158.8	35.6	11.8	20.2	36.7	118	6.3	20.1	42.3	2.9	22.8	0.9		98.9071	0.222615	99.1297
080531-1715MS	08MS019	Patrick Grade	PG-3	1	3	interrind	roadcut	Sawlan	-117.753	46.2494	chipped	Sawlan	2009-10-01 06:34:58	98.4926	52.0487	1.89473	13.67	11.6878	0.17585	4.59193	8.75662	2.76543	0.83316	0.26897		15.1	24.4	38.5	331.5	415.2	19.9	317.6	148.9	33.4	11.4	20.4	32.9	112.7	4.6	21.5	36.2	2.8	20.4	0.1		96.6932	0.203301	96.8965
090617-1010MS	10MS045	Patrick Grade	PG-4	4	11	interrind	outcrop	Sawlan	-117.754	46.2502	chipped	Sawlan	2010-04-16 20:33:40	97.1191	53.5435	1.80565	14.3797	10.7176	0.18177	4.68223	9.05382	2.93173	0.97824	0.27505		18.1	49	38.3	327.2	454.3	21.9	320.4	157.5	34.4	12.4	22.2	40.2	114.1	4.8	20.1	40	2.6	24.2	1.3		98.5493	0.215169	98.7644
090616-1909MS	10MS044	Patrick Grade	PG-5	4	11	interrind	roadcut	Sawlan	-117.755	46.2502	chipped	Sawlan	2010-04-16 19:27:36	95.0275	54.2036	1.85335	14.7574	9.47631	0.18182	4.96202	9.24996	2.94373	1.04146	0.2788		19.1	50.7	39.2	339.9	532.1	23.9	339.3	157.7	34.1	11.1	20.9	41.5	121.2	6.1	19.8	41.4	2.9	23.8	2.4		98.9484	0.229752	99.1782
100927-1642MS	10MS104	Sentinel Gap	SG-1	1	2	interseam	outcrop	Sawlan	-119.924	46.8008	sawn	Sawlan	2011-10-25 20:48:58	100.179	52.6044	1.93703	13.4779	12.2562	0.202613	4.53363	8.29751	2.88239	1.12493	0.303197		12.276	17.82	35.442	335.115	457.083	30.789	319.572	160.578	33.462	11.286	19.701	26.136	118.008	5.445	20.196	45.936	3.861	27.324	1.386		97.6198	0.211636	97.8314
100927-1642MS-b	10MS114	Sentinel Gap	SG-1	1	2	interseam	outcrop	Sawlan	-119.924	46.8008	chipped	Sawlan	2011-10-26 07:49:52	99.8512	53.1689	1.97047	13.5895	12.1559	0.204712	4.49011	8.2809	2.91963	1.18295	0.309088		10.989	18.711	35.442	334.125	470.349	31.878	316.998	161.865	32.967	10.89	20.493	25.641	120.384	5.742	17.622	44.55	4.653	25.938	0.792		98.2722	0.21257	98.4848
100927-1642MS-a	10MS283	Sentinel Gap	SG-1	1	2	hyd. seam	outcrop	Sawlan	-119.924	46.8008	chipped	Sawlan	2011-10-26 11:08:10	100.25	52.8491	1.95068	13.5244	12.3636	0.204049	4.53843	8.30346	2.90606	1.14669	0.306672		11.187	19.503	35.64	335.808	457.677	31.977	317.691	160.974	33.264	11.187	20.394	25.641	123.057	5.643	17.523	43.164	3.564	22.275	3.663		98.0931	0.211519	98.3046
100928-1505MS	10MS105	Sentinel Gap	SG-2	3	8	interseam	outcrop	Sawlan	-119.922	46.7979	sawn	Sawlan	2011-10-25 21:55:06	99.5688	52.5495	1.85936	13.6876	11.7368	0.199841	4.72798	8.46921	2.95451	1.0326	0.296406		16.335	34.749	36.729	318.879	462.825	25.74	305.019	157.509	32.67	11.286	19.998	30.69	115.038	4.158	16.038	36.63	2.673	20.988	0.099		97.5138	0.207744	97.7216
100928-1505MS-a	10MS284	Sentinel Gap	SG-2	3	8	hyd. seam	outcrop	Sawlan	-119.922	46.7979	chipped	Sawlan	2011-10-26 12:14:12	99.6147	52.8293	1.86282	13.776	11.8349	0.197703	4.78897	8.50891	2.97245	1.04122	0.295624		15.84	35.244	36.135	313.632	464.706	25.443	305.613	157.113	32.373	11.088	20.79	31.185	115.137	5.742	19.206	40.986	3.465	23.76	0.099		98.1079	0.20869	98.3166
110502-1242MS	10MS113	Sentinel Gap	SG-2	3	8	interseam	roadcut	Sawlan	-119.925	46.7921	chipped	Sawlan	2011-10-26 06:43:50	98.986	52.5988	1.87584	13.8055	11.7061	0.202782	4.73473	8.68191	2.86119	1.00791	0.305296		15.642	35.244	36.432	315.81	460.251	25.146	311.751	157.113	32.472	11.088	21.087	30.393	119.79	4.455	18.612	46.728	3.465	23.067	1.881		97.7801	0.210371	97.9905
110502-1242MS-a	10MS293	Sentinel Gap	SG-2	3	8	hyd. seam	roadcut	Sawlan	-119.925	46.7921	chipped	Sawlan	2011-10-26 22:08:44	99.4265	52.6795	1.89272	13.7336	11.8473	0.204871	4.80029	8.62792	2.81042	1.05361	0.307801		14.157	33.462	38.412	315.81	448.074	27.819	311.553	160.083	34.254	11.583	21.186	29.997	118.998	5.841	18.81	42.372	3.366	24.354	1.881		97.958	0.209475	98.1675
100927-1823MS	10MS106	Sentinel Gap	SG-3	3	9	interseam	roadcut	Sawlan	-119.925	46.7917	sawn	Sawlan	2011-10-25 23:01:10	99.1346	52.3778	1.81307	13.857	11.6225	0.200099	4.9736	8.79086	2.74373	0.976863	0.280724		16.533	39.699	35.838	318.186	418.374	25.344	312.345	152.757	32.274	10.791	20.394	33.561	115.038	5.049	22.077	42.174	2.673	23.166	1.881		97.6362	0.205699	97.8419
100927-1823MS-a	10MS285	Sentinel Gap	SG-3	3	9	hyd. seam	roadcut	Sawlan	-119.925	46.7917	chipped	Sawlan	2011-10-26 13:20:16	98.9831	52.3017	1.80861	13.8651	11.4483	0.201079	5.05498	8.83868	2.74037	0.95336	0.280309		17.721	40.491	36.234	314.622	415.107	25.047	312.345	153.648	31.977	10.791	20.394	32.67	111.87	5.049	23.265	43.164	3.762	23.265	1.782		97.4925	0.205067	97.6976
100928-1808MS	10MS107	Sentinel Gap	SG-4	4	10	interseam	roadcut	Sawlan	-119.925	46.7908	sawn	Sawlan	2011-10-26 00:07:18	100.052	53.3806	1.82759	13.9731	11.8475	0.204098	4.97984	8.69431	2.88707	1.24107	0.318028		17.919	42.372	36.828	306.9	485.1	31.086	309.672	161.766	33.561	11.484	20.097	33.66	117.81	5.346	19.008	47.025	3.762	25.245	2.178		99.3533	0.214983	99.5682
100928-1808MS-a	10MS286	Sentinel Gap	SG-4	4	10	hyd. seam	roadcut	Sawlan	-119.925	46.7908	chipped	Sawlan	2011-10-26 14:26:18	100.154	53.2271	1.81918	13.9424	11.9419	0.202712	4.95785	8.67173	2.87793	1.23617	0.318958		16.83	40.491	36.432	302.742	483.318	31.779	308.88	161.172	34.155	11.286	20.394	36.729	117.414	3.861	20.691	41.184	3.267	23.76	1.386		99.196	0.213026	99.409
100928-1840MS	10MS108	Sentinel Gap	SG-5	4	10	interseam	outcrop	Sawlan	-119.925	46.7903	sawn	Sawlan	2011-10-26 01:13:22	99.4731	52.4803	1.7874	13.8344	11.6269	0.187684	4.89996	8.66255	2.77748	1.05176	0.282794		18.018	40.689	33.66	319.869	447.579	26.928	308.484	156.42	32.67	10.989	19.305	35.343	112.959	5.247	18.909	41.481	3.663	22.077	0.792		97.5912	0.208745	97.8
100928-1840MS-a	10MS287	Sentinel Gap	SG-5	4	10	hyd. seam	outcrop	Sawlan	-119.925	46.7903	chipped	Sawlan	2011-10-26 15:32:20	100.02	52.3728	1.79109	13.742	11.8197	0.189169	4.95699	8.67702	2.75882	1.03346	0.280546		17.127	41.877	35.244	318.582	444.51	27.72	307.098	156.618	31.779	11.979	19.701	36.531	112.068	4.851	17.82	42.372	3.663	20.988	2.277		97.6216	0.208561	97.8302
100928-1657MS	10MS109	Sentinel Gap	SG-6	4	11	interseam	outcrop	Sawlan	-119.923	46.7904	sawn	Sawlan	2011-10-26 02:19:28	99.6782	52.5813	1.75893	13.9223	11.5621	0.192951	5.06493	8.86965	2.75959	1.05361	0.272933		18.117	47.421	36.432	320.166	422.235	28.116	305.118	152.955	31.68	10.791	19.701	38.115	110.781	3.96	17.622	41.382	2.97	21.384	3.267		98.0383	0.206431	98.2447
100928-1657MS-a	10MS288	Sentinel Gap	SG-6	4	11	hyd. seam	outcrop	Sawlan	-119.923	46.7904	chipped	Sawlan	2011-10-26 16:38:26	99.3994	52.5067	1.75496	13.9455	11.4535	0.193169	5.07407	8.88127	2.7407	1.04115	0.271765		17.622	46.431	36.333	315.216	419.364	27.819	304.623	151.47	31.482	10.296	21.384	38.214	111.87	4.851	18.216	38.115	4.059	21.978	1.782		97.8628	0.20494	98.0678
110430-1712MS	10MS112	Sentinel Gap	SG-7	4	12	interseam	outcrop	Sawlan	-119.923	46.7898	chipped	Sawlan	2011-10-26 05:37:44	99.9183	51.9723	1.74487	13.7035	11.513	0.181665	5.06581	8.71746	2.67746	1.01028	0.272785		17.82	42.966	36.036	319.671	416.691	25.443	304.92	150.678	31.086	10.296	19.8	34.155	112.959	4.257	18.513	38.709	4.554	22.671	1.584		96.8591	0.203962	97.0631
110430-1712MS-a	10MS292	Sentinel Gap	SG-7	4	12	hyd. seam	outcrop	Sawlan	-119.923	46.7898	chipped	Sawlan	2011-10-26 21:02:40	99.9557	52.0524	1.74399	13.7196	11.5378	0.182457	5.05659	8.73526	2.67988	1.00418	0.271161		16.236	42.57	35.541	317.394	417.483	25.146	304.227	151.569	30.789	10.989	18.315	35.145	109.989	4.356	18.81	38.907	2.772	21.285	1.287		96.9834	0.202674	97.186
100928-1248MS	10MS110	Sentinel Gap	SG-8	5	13	interseam	outcrop	Sawlan	-119.923	46.7898	sawn	Sawlan	2011-10-26 03:25:36	100.164	53.3729	1.79075	13.7533	11.6064	0.195584	4.49456	8.20474	2.8949	1.26089	0.360281		13.365	33.363	33.165	289.773	540.639	34.947	311.652	169.191	35.442	12.078	20.592	24.948	118.404	6.732	21.087	44.055	5.049	23.661	1.683		97.9343	0.217175	98.1514
100928-1248MS-a	10MS289	Sentinel Gap	SG-8	5	13	hyd. seam	outcrop	Sawlan	-119.923	46.7898	chipped	Sawlan	2011-10-26 17:44:32	99.9037	53.6205	1.79207	13.8636	11.5765	0.195406	4.52489	8.25832	2.91254	1.25455	0.360934		12.573	35.145	34.254	290.367	537.174	34.551	310.959	169.191	34.353	11.781	19.701	25.443	117.909	6.633	20.493	44.253	4.356	25.443	0.99		98.3593	0.216774	98.5761
100928-1248MS-b	10MS290	Sentinel Gap	SG-8	5	13	interrind	outcrop	Sawlan	-119.923	46.7898	chipped	Sawlan	2011-10-26 18:50:34	99.7012	53.3377	1.78314	13.801	11.3841	0.194802	4.4944	8.1917	2.89289	1.26853	0.360617		13.365	33.264	32.967	290.961	533.115	35.343	309.276	168.597	34.65	11.385	18.909	26.631	118.899	5.841	21.285	46.926	4.059	25.641	1.98		97.7089	0.216424	97.9253
100928-1102MS	10MS111	Sentinel Gap	SG-9	5	14	interseam	outcrop	Sawlan	-119.922	46.79	sawn	Sawlan	2011-10-26 04:31:40	100.046	54.1182	1.71838	13.9375	10.9752	0.204831	4.61103	8.16932	2.93472	1.36805	0.312137		16.236	37.521	34.254	291.555	556.875	36.531	304.821	170.775	36.729	11.682	19.8	27.225	120.384	6.138	21.582	46.629	4.554	27.423	0.792		98.3493	0.221096	98.5704
100928-1102MS-a	10MS291	Sentinel Gap	SG-9	5	14	hyd. seam	outcrop	Sawlan	-119.922	46.79	chipped	Sawlan	2011-10-26 19:56:36	100.125	54.3141	1.71538	13.9797	10.9671	0.204178	4.65512	8.2091	2.93509	1.366	0.313642		14.85	36.63	32.769	294.03	559.647	37.323	306.405	170.379	35.244	11.682	19.206	27.918	116.82	7.128	20.592	45.342	4.95	25.641	2.277		98.6594	0.220664	98.8801
080602-1824MS	09MS009	Wallace Cyn	WC-1	3	9	interrind	roadcut	Sawlan	-120.014	45.2822	chipped	Sawlan	2010-04-23 02:59:54	98.7887	52.4144	1.80788	13.9051	11.0651	0.255179	4.4477	9.41756	2.83974	1.07101	0.291678		17.6	37.8	36.6	322.8	498.8	25.8	319.7	156.5	32.8	11.4	20.4	31.2	114.4	6.5	16.8	40.4	3	22.1	0		97.5153	0.215563	97.7309
080722-1922MS	09MS010	Wallace Cyn	WC-2	3	9	interrind	roadcut	Sawlan	-120.012	45.2809	chipped	Sawlan	2010-04-23 04:05:56	98.4128	53.2495	1.81646	14.1504	11.2162	0.19964	4.78868	8.88274	2.99677	1.04888	0.29231		19.1	38.5	37.8	323.1	473.6	26.2	323.4	158.6	33.4	12.2	19.8	31.9	116.4	5.8	20.6	43	2.1	22.6	3		98.6416	0.215458	98.8571
110428-1137MS	10MS244	Winter Water Ck	WW-1	3	8	interseam	roadcut	Sawlan	-121.059	45.2516	chipped	Sawlan	2011-11-14 15:10:36	99.7664	52.4373	1.81956	13.6798	11.6871	0.18712	5.06682	8.17896	2.91124	1.02959	0.285575		16.434	37.026	35.739	310.662	457.182	25.344	297.891	153.351	32.868	11.187	19.404	31.086	117.216	4.653	20.097	42.273	3.267	24.354	3.267		97.2831	0.206934	97.4901
110428-1137MS-a	10MS248	Winter Water Ck	WW-1	3	8	hyd. seam	roadcut	Sawlan	-121.059	45.2516	chipped	Sawlan	2011-11-14 19:35:08	99.9816	52.6766	1.82773	13.7034	11.77	0.187793	5.09095	8.22986	2.90591	1.03034	0.28712		15.939	34.551	36.135	313.335	458.469	25.344	301.059	154.539	33.363	10.197	20.196	29.997	114.246	4.95	18.216	42.768	4.752	25.641	1.287		97.7098	0.207137	97.9169
06BV-G523	06BV-G523	Western Gorge	WG-1	5	13	interrind	outcrop	Evarts	-122.221	45.5376	sawn	WSU staff	2007-01-28 03:31:00	99.2573	52.8701	1.74825	13.8039	10.9302	0.19642	4.69261	8.20097	2.85668	1.38422	0.32762		15	35.8	35.2	301.6	535.9	33.1	310.1	161.1	34.2	10.2	19.3	23.6	114.4	5.6	20.2	43.1	5	25.4	0		97.0109	0.216186	97.227
97SH-X49A	97SH-X49A	Saint Helens	SH-1	3	7	interrind	quarry	Evarts	-122.803	45.8621	sawn	WSU staff	2013-06-11 00:02:10	100.135	52.7219	1.94248	13.601	12.2253	0.212481	4.78662	8.43764	2.96183	1.13304	0.325838		20.2335	34.1502	37.3086	317.913	487.183	29.2152	312.879	163.546	35.4333	13.1271	21.3192	30.1035	121.697	4.935	20.5296	37.506	4.4415	22.9971	1.4805		98.3481	0.215797	98.5639
99SH-X98	99SH-X98	Saint Helens	SH-2	3	7	interrind	outcrop	Evarts	-122.796	45.8508	sawn	WSU staff	2013-06-10 21:49:56	99.4464	53.1615	1.97211	13.8065	12.3317	0.210231	4.73705	8.54424	2.93061	1.13118	0.328128		20.9244	32.2749	37.6047	318.702	473.267	26.7477	316.235	165.717	35.532	12.2388	20.2335	29.4126	120.907	5.7246	20.8257	41.0592	4.0467	23.3919	1.7766		99.1533	0.214783	99.3681
00SH-X111	00SH-X111	Saint Helens	SH-3	3	7	interrind	outcrop	Evarts	-122.84	45.8712	sawn	WSU staff	2013-06-10 22:56:02	99.4374	53.3023	1.98536	13.8724	12.5779	0.22703	4.6711	8.58915	2.99948	1.08503	0.339794		22.0101	33.2619	37.1112	321.959	494.191	27.7347	321.861	168.481	36.9138	11.5479	22.0101	29.61	124.954	7.9947	21.6153	40.2696	3.8493	23.7867	0.8883		99.6496	0.219962	99.8695
97LC-Q70	97LC-Q70	La Center	LC-1	5	13	interrind	outcrop	Evarts	-122.698	45.873	sawn	WSU staff	2013-06-10 20:43:50	99.8254	54.3008	1.81438	14.057	11.4581	0.199897	4.67359	8.43193	3.07174	1.26574	0.354629		21.1218	35.3346	35.6307	301.923	552.72	32.571	317.32	169.468	36.0255	12.4362	19.9374	26.649	122.388	7.0077	19.3452	50.0409	3.7506	26.9451	0		99.6278	0.22377	99.8516
00LC-Q447	00LC-Q447	La Center	LC-2	5	13	interrind	roadcut	Evarts	-122.673	45.8596	sawn	WSU staff	2013-06-10 19:37:42	100.073	54.3307	1.81036	14.0237	11.5075	0.204467	4.6915	8.42232	3.03268	1.26679	0.348283		22.0101	36.8151	35.9268	303.799	560.715	34.8411	317.814	170.159	34.545	12.1401	21.2205	27.5373	120.71	9.2778	21.0231	46.1916	4.7376	23.5893	0.987		99.6382	0.225356	99.8636
T1248	10MS201	Willamette Vly	WV-01	3	7	interrind	quarry	Hagstrum/Sawlan	-122.756	44.9285	drilled/sawn - pmag core	WSU staff	2011-04-09 04:00:48	99.4314	53.3811	1.99029	13.7721	11.9557	0.2157	4.78821	8.56848	2.98184	1.11775	0.33578		19.3	34.2	37.6	324.3	491	27.8	313.2	167.8	35.8	12.5	22.2	30.1	122.3	6.3	18.1	43.2	2.2	23.8	2.3		99.1071	0.218194	99.3253
T3407	10MS215	Willamette Vly	WV-02	3	7	interrind	quarry	Hagstrum/Sawlan	-123.124	45.1558	drilled/sawn - pmag core	WSU staff	2011-04-09 19:25:12	94.9844	54.2522	2.08289	14.4008	10.2617	0.18926	4.29114	8.71915	3.0138	1.43373	0.34956		20.9	34.7	37.8	338	540.9	31.6	336.7	177	39.2	12.2	22.2	31.8	148.7	6.3	21.5	46.7	4.2	27.4	1.8		98.9943	0.235834	99.2301
T3421	10MS217	Willamette Vly	WV-03	4	10	interrind	quarry	Hagstrum/Sawlan	-123.123	45.1561	drilled/sawn - pmag core	WSU staff	2011-04-09 21:37:16	97.3005	54.4529	1.87297	14.3492	10.3196	0.18853	4.55846	8.81012	2.91767	1.40126	0.30352		21.7	39.8	37.7	336.9	512.9	33.4	325.7	166.5	36.2	11.6	22	33.5	127.2	6.8	22.7	43	2.9	24.4	1.2		99.1742	0.227075	99.4013
T3445	10MS220	Willamette Vly	WV-04	3	9	interrind	quarry	Hagstrum/Sawlan	-122.652	45.3541	drilled/sawn - pmag core	WSU staff	2011-04-11 12:34:58	94.4593	54.2626	1.94382	14.5669	9.50348	0.15815	4.43097	8.81237	3.11168	1.03523	0.30052		14.2	39.5	37.8	321.9	486.6	24.1	343.4	162.9	36.8	11.2	23.4	31.7	127.7	5.4	21.6	36.2	2.4	22.7	1.4		98.1257	0.220235	98.3459
070921-1250RW	07RW004	Willamette Vly	WV-05	3	8	interrind	outcrop	Wells/Sawlan	-123.047	45.2889	chipped	WSU staff	2013-06-10 16:19:22	99.6673	52.8704	1.87256	13.6655	11.5346	0.206273	4.59025	8.67562	2.9706	0.919637	0.297275		22.1088	35.8281	36.3216	318.604	463.1	18.4569	311.892	154.959	37.9008	10.857	21.3192	32.8671	122.289	4.7376	17.6673	43.1319	2.8623	23.3919	1.1844		97.6027	0.211665	97.8144
070924-1633RW	07RW006	Willamette Vly	WV-06	3	7	interrind	outcrop	Wells/Sawlan	-123.072	45.2597	chipped	WSU staff	2013-06-10 17:25:30	100.15	53.0942	1.95319	13.612	12.2308	0.223023	4.58437	8.46586	3.05138	0.995992	0.323766		16.4829	32.571	35.7294	318.011	484.716	20.6283	309.918	161.375	34.0515	11.2518	21.3192	27.5373	119.427	5.0337	18.4569	39.7761	2.7636	22.7997	0.987		98.5346	0.211733	98.7464
070926-1227RW	07RW012	Willamette Vly	WV-07	3	7	interrind	outcrop	Wells/Sawlan	-123.082	45.264	chipped	WSU staff	2013-06-10 18:31:38	96.9695	53.3562	2.01214	14.0069	10.982	0.195179	4.34565	8.65177	2.96089	1.32854	0.336952		14.7063	35.0385	38.493	324.723	562.787	29.8074	320.38	168.58	38.2956	11.9427	19.74	30.4983	127.619	5.0337	20.3322	46.4877	3.4545	27.636	3.5532		98.1763	0.228996	98.4053
T2128	10MS206	Abernathy Cr	AB-1	5	13	interrind	roadcut	Hagstrum/Sawlan	-123.164	46.193	drilled/sawn - pmag core	WSU staff	2011-04-09 09:30:54	99.6167	53.3273	1.77878	13.8475	11.3268	0.19404	4.55918	8.30558	2.91992	1.26935	0.34246		15.4	35.4	35.3	298.5	540	32.9	311.9	166.2	35.1	11.2	19.6	26.5	117.7	6.1	18	45.4	3.5	24.9	0.8		97.8709	0.218084	98.089
T2152	10MS208	Abernathy Cr	AB-2	5	15	interrind	roadcut	Hagstrum/Sawlan	-123.134	46.189	drilled/sawn - pmag core	WSU staff	2011-04-09 11:42:58	99.8977	52.9722	1.69493	13.8529	11.3971	0.18488	4.64074	8.4281	2.91938	1.11563	0.30174		16	37.3	36.2	302.8	515.6	26.1	312.7	158.8	32.3	11.5	19.4	26.8	112.8	6.3	21.4	44.4	2.1	24.6	1.4		97.5076	0.214093	97.7217

## Sheet: SB.n
Supplemental File 2: Alteration, mass analysis and magmatic compositions of the Sentinel Bluffs Member, Columbia River flood basalt province, by M. G. Sawlan
Normalized Major and Trace Element Abundances						Major elements (wt. %)											Trace elements (ppm)
Chem_ID_field	Chem_ID_lab	SB_Sec_Flow	SB_Series	SB_Group	MIs	SiO2n	TiO2n	Al2O3n	FeOn	MnOn	MgOn	CaOn	Na2On	K2On	P2O5n		Nin	Crn	Scn	Vn	Ban	Rbn	Srn	Zrn	Yn	Nbn	Gan	Cun	Znn	Pbn	Lan	Cen	Thn	Ndn	Un		Total.M-oxn	Total.Tr-oxn	Total.M+Tr-oxn
080721-1914MS	10MS027	AC-1	3	9	99.1523	53.8039	1.87709	14.1204	11.5578	0.204253	5.0013	8.79347	2.93864	1.18792	0.299583		17.7443	38.4124	38.7149	331.597	469.015	26.314	319.398	160.606	33.6739	11.4935	21.6763	33.1698	120.178	4.43608	17.1394	41.0338	3.0246	21.878	0.40328		99.7843	0.215717	100
080721-1807MS	10MS028	AC-1	3	9	99.5376	53.6634	1.84799	14.1013	11.7625	0.204739	5.04473	8.78158	2.95823	1.12504	0.295802		17.6635	39.5422	38.0368	330.187	467.983	26.696	321.155	158.57	34.3234	11.7422	21.2765	31.8144	117.021	5.21877	19.5704	37.4346	2.50902	21.5776	0.401444		99.7852	0.214755	100
080721-1701MS	10MS029	AC-2	3	9	97.0855	54.1581	1.86575	14.5045	10.7637	0.191732	4.83458	9.20595	2.89627	1.07095	0.290338		21.265	40.4853	37.7249	335.844	458.629	22.5941	337.377	157.545	33.0221	11.3481	22.1851	31.8975	119.922	5.62295	22.1851	42.2233	3.47601	24.3321	1.22683		99.7818	0.218155	100
CB0119	10MS173	BG-01	1	1	99.5353	54.065	2.05225	13.7689	12.5061	0.208985	4.42634	8.21743	3.03681	1.16391	0.332315		11.2847	16.6301	35.6359	350.024	513.058	30.9834	323.297	167.885	33.9531	12.2746	19.9957	26.8259	125.518	5.74134	21.0846	41.0803	5.34538	24.6482	2.17775		99.778	0.222006	100
100514-1258MS	10MS174	BG-02	1	2	99.8727	53.779	1.96568	13.8521	12.3556	0.208887	4.72076	8.57143	2.98632	1.04865	0.297054		12.4742	20.6572	37.9214	335.106	472.022	24.7487	322.731	162.064	33.6303	11.2766	20.8568	27.1438	119.951	5.68821	20.6572	45.9049	3.79214	26.1458	1.69648		99.7855	0.214546	100
100514-1258MS-a	10MS175	BG-02	1	2	100.006	53.8439	1.95553	13.8459	12.351	0.206975	4.71235	8.56821	2.95506	1.05258	0.294577		12.6053	19.8508	36.4263	335.876	476.023	25.2106	323.47	161.586	33.7464	11.1165	22.1337	27.3942	119.998	5.95525	17.4687	43.2748	3.07688	22.7292	0.893288		99.7862	0.213813	100
100514-1106MS	10MS178	BG-03	1	2	99.7327	53.8966	1.95455	13.8942	12.3918	0.208624	4.62196	8.49691	2.86884	1.1466	0.30666		12.4516	18.6773	36.2501	335.288	457.394	30.0243	324.845	161.669	33.8401	11.347	20.9869	26.7106	120.499	5.32204	21.0873	46.4925	4.01663	24.401	3.01247		99.7867	0.213282	100
100514-1106MS-a	10MS259	BG-03	1	2	99.7315	53.8979	1.95512	13.8935	12.3737	0.209189	4.64503	8.51614	2.86956	1.12131	0.305976		13.1553	20.5865	36.0515	337.819	457.322	30.4279	325.066	160.776	34.5452	12.3519	21.0886	24.4025	119.703	4.51899	19.6827	39.9679	4.92068	23.9004	1.20506		99.7874	0.212586	100
100813-1501MS	10MS176	BG-04	2	4	99.7157	53.6198	2.04486	13.75	12.6153	0.212742	4.60351	8.38963	2.89479	1.29704	0.352167		14.4559	32.5009	35.7909	322.218	500.973	31.0055	314.84	172.574	36.3891	12.0632	20.9362	28.1143	127.611	5.78238	23.4286	41.673	3.98785	25.8213	2.79149		99.7798	0.220178	100
100813-1501MS-a	10MS177	BG-04	2	4	99.8247	53.6621	2.04153	13.7368	12.5935	0.212227	4.62226	8.43349	2.88794	1.24336	0.347593		14.9786	33.4522	35.8488	322.04	494.094	30.057	317.346	171.255	36.0485	11.7832	21.4693	27.5606	124.222	4.79315	20.271	46.6333	3.99429	26.9615	1.19829		99.7808	0.219201	100
100813-1501MS-b	10MS258	BG-04	2	4	99.8899	53.6656	2.02521	13.7522	12.5845	0.211089	4.64466	8.43863	2.88605	1.22519	0.346563		14.3428	32.3966	37.8127	324.768	490.262	29.3876	316.845	170.408	35.4056	12.6377	21.1631	28.0837	125.073	6.21854	23.2694	49.2468	4.61376	26.4789	3.20957		99.7798	0.220226	100
100512-1730MS	10MS179	BG-05	2	5	99.5534	53.5621	1.97061	13.8988	12.344	0.210733	4.8354	8.63761	2.8606	1.13646	0.328364		16.0246	37.6578	37.9582	322.895	466.315	27.7425	317.787	162.75	35.7548	11.1171	21.4329	31.2479	123.79	3.70568	19.2295	42.5653	4.20645	24.7379	1.60246		99.7847	0.215287	100
100512-1624MS	10MS180	BG-06	2	5	99.7488	53.463	1.99211	13.8303	12.5052	0.211505	4.82653	8.58583	2.97493	1.05863	0.332889		15.3396	36.7343	37.2389	324.755	496.114	26.4406	317.287	165.809	35.826	11.4038	20.4864	28.8626	121.909	5.65143	22.3029	45.9178	3.53214	25.2296	1.21102		99.7809	0.219076	100
100512-1624MS-a	10MS260	BG-06	2	5	99.9194	53.434	1.98006	13.8207	12.5743	0.211554	4.81781	8.58891	2.9603	1.05983	0.334532		16.2195	37.445	37.8455	324.49	496.397	26.0313	314.578	165.499	34.5415	11.4137	21.2255	29.6356	122.447	6.50782	17.1206	39.8479	3.60433	26.5319	1.60193		99.782	0.218014	100
100512-1349MS	10MS181	BG-07	3	8	99.8129	53.6377	1.8768	14.0072	12.1286	0.205815	4.95883	8.73152	2.85654	1.07869	0.308528		15.5792	34.454	37.45	312.883	457.49	26.0652	320.672	158.389	33.5552	10.9853	20.7723	28.462	118.542	3.79494	17.4767	42.0439	3.49534	22.2703	1.7976		99.7902	0.209798	100
100512-1349MS-a	10MS261	BG-07	3	8	99.2882	53.7459	1.88248	14.0881	11.909	0.205129	4.94124	8.76398	2.86205	1.08031	0.310936		17.0932	34.9908	37.3034	313.309	459.606	27.0475	320.85	157.459	33.9853	10.8592	22.1206	29.0585	120.557	4.72577	17.1938	42.1298	2.9159	22.8245	1.00548		99.7891	0.210881	100
100512-1349MS-b	10MS262	BG-07	3	8	99.403	53.7578	1.88126	14.0703	11.855	0.205916	4.98506	8.75945	2.88061	1.0816	0.31006		15.8876	35.2947	36.5013	316.848	463.758	26.9486	319.864	157.77	33.6858	11.1616	20.6137	28.457	119.962	5.73161	21.5187	45.8529	4.22329	25.9431	2.41331		99.7871	0.212942	100
100512-1256MS	10MS182	BG-08	3	8	99.6456	53.5419	1.88331	14.0252	12.0923	0.204611	5.04097	8.83667	2.8731	0.995662	0.295414		16.9714	37.056	37.759	315.83	462.748	23.2981	316.733	158.869	34.0433	11.2474	20.4862	30.4281	116.189	5.02114	17.4736	40.5708	2.61099	24.9048	1.3055		99.7892	0.210838	100
100512-1256MS-a	10MS263	BG-08	3	8	99.5788	53.688	1.88372	14.036	11.8205	0.205388	5.07038	8.87251	2.90472	1.0094	0.296461		17.5277	36.7778	38.5002	324.617	459.672	24.4172	315.904	158.053	34.1436	11.2461	20.5672	31.408	117.831	5.97766	19.7567	43.566	2.22896	23.6067	2.43159		99.7871	0.212863	100
100512-1051MS	10MS183	BG-09	4	10	100.357	53.6636	1.82153	14.0047	12.1876	0.193913	5.01435	8.67673	2.92224	1.01044	0.288924		19.0042	43.4096	36.108	325.072	484.207	24.2053	312.469	158.935	33.1073	11.2025	19.6043	35.6079	115.025	5.9013	20.7046	41.8092	4.40097	21.9048	1.90042		99.7841	0.215936	100
100512-1051MS-a	10MS264	BG-09	4	10	99.4945	54.054	1.83222	14.1344	11.639	0.187692	4.98443	8.65861	2.95813	1.041	0.292655		18.6123	43.5627	35.9166	326.771	487.943	23.542	312.384	160.971	32.8984	11.771	20.6244	37.6269	116.301	6.03641	19.4171	45.8767	4.72852	24.3468	0		99.7822	0.217818	100
100512-1051MS-b	10MS265	BG-09	4	10	99.995	53.8291	1.81632	14.0746	11.9	0.194801	5.04832	8.70532	2.929	0.999823	0.288706		17.6529	43.1177	35.9145	322.723	476.121	22.7256	311.36	158.166	32.7694	11.4642	19.5805	36.1174	114.845	6.79738	16.7398	42.7119	3.85523	25.1604	0.30436		99.786	0.213964	100
100511-1800MS	10MS184	BG-10	4	12	99.3894	54.0287	1.81372	14.1826	11.6266	0.196351	4.91313	8.78366	2.76718	1.1835	0.289986		18.9822	41.3792	35.6544	327.217	456.377	29.2266	317.576	157.783	32.8423	11.2487	19.5848	34.7505	117.609	4.72045	22.2966	43.9906	4.62001	24.4057	1.50653		99.7854	0.214558	100
100511-1800MS-a	10MS266	BG-10	4	12	99.5887	53.9723	1.80427	14.1637	11.7563	0.196933	4.89182	8.77052	2.77596	1.16231	0.291169		18.5131	43.868	36.2213	329.916	455.08	29.5807	316.634	158.569	32.5992	11.3695	20.8272	33.4041	113.996	5.63442	19.8211	44.3711	4.02459	25.3549	1.40861		99.7853	0.214657	100
100511-1303MS	10MS185	BG-11	5	15	99.1903	54.4891	1.76489	14.253	11.275	0.192481	4.69525	8.56657	2.95614	1.26363	0.322123		15.6973	39.144	35.8655	308.781	540.664	31.9908	321.199	166.014	33.9778	11.3259	20.4662	28.6129	118.127	7.15322	19.274	45.6018	4.76881	24.2415	0		99.7781	0.221894	100
100511-1303MS-a	10MS267	BG-11	5	15	98.8868	54.5364	1.76648	14.3018	11.1456	0.192043	4.70982	8.57516	2.97283	1.25606	0.321882		15.1618	38.758	34.842	308.859	539.197	31.8297	320.105	163.767	34.1391	11.5471	20.9855	28.3154	115.872	7.93233	22.4917	44.8829	4.41801	27.2109	3.41391		99.7781	0.221869	100
100511-1401MS	10MS186	BG-12	5	15	100.042	54.2776	1.74741	14.1348	11.5459	0.196849	4.87093	8.51541	2.96731	1.20774	0.317121		15.8853	38.4227	35.9406	308.672	531.663	30.5793	317.806	161.534	33.3592	10.524	20.9488	27.7001	116.261	4.56704	20.7502	45.5711	5.06345	21.2467	1.48925		99.7811	0.218906	100
100511-1620MS	10MS187	BG-13	5	15	98.9869	54.4066	1.76243	14.2903	11.1467	0.191405	4.82554	8.66934	2.94592	1.22722	0.313626		15.481	39.7513	35.4566	310.22	539.239	30.6624	322.705	162.101	33.5589	10.587	21.7733	28.1655	116.357	5.29351	19.1765	41.649	4.49449	24.8695	3.19608		99.7791	0.220887	100
110427-1738MS	10MS147	BL-1	2	5	98.3624	54.0747	2.03466	14.0016	11.8757	0.207014	4.33351	8.63668	2.90889	1.36043	0.343508		16.223	37.8538	37.0526	329.568	502.414	30.8438	319.854	171.844	36.5519	12.4176	21.13	30.944	125.378	5.00711	19.5277	46.0654	3.90555	27.2387	1.50213		99.7767	0.223284	100
110427-1738MS-a	10MS320	BL-1	2	5	98.3057	54.0467	2.02711	14.0239	11.873	0.206843	4.35852	8.64303	2.90307	1.34742	0.346203		15.8878	38.7139	36.8033	327.811	506.8	31.4739	319.968	170.743	36.7028	12.0667	20.4128	31.5745	126.197	5.73167	22.9267	47.2611	3.21778	27.4517	2.51389		99.7758	0.224229	100
100924-1440MS	10MS139	BL-2	2	6	99.781	53.4583	1.92575	13.9329	12.2897	0.209053	4.85204	8.575	2.89084	1.32066	0.330264		16.803	39.671	36.7877	320.152	484.007	28.7342	318.462	163.357	34.5009	11.6329	20.1835	29.4301	121.896	5.17016	18.5927	37.6825	3.38049	21.9732	0.596557		99.7844	0.215582	100
100924-1440MS-a	10MS310	BL-2	2	6	99.8554	53.4908	1.9246	13.922	12.3195	0.210758	4.83478	8.58381	2.84284	1.32367	0.330333		16.7308	41.7273	36.6484	316.391	479.615	29.7768	318.084	162.328	35.0549	10.7555	20.6147	30.0756	121.497	5.87569	21.511	45.6113	3.2864	26.7891	2.19093		99.7831	0.216892	100
100924-1559MS	10MS140	BL-3	3	7	100.011	53.7221	1.93721	13.8748	12.355	0.196137	4.85622	8.37705	3.05011	1.0996	0.318793		13.4094	32.1224	36.8257	315.22	489.442	28.0196	307.715	164.015	34.7243	12.1085	20.7145	28.2197	118.283	5.40378	18.3128	41.1287	2.80196	22.3156	2.70189		99.7871	0.212862	100
100924-1559MS-a	10MS311	BL-3	3	7	100.059	53.8041	1.94621	13.8521	12.2557	0.196037	4.85984	8.40829	3.03375	1.10864	0.318958		15.8314	33.2762	37.2089	319.956	496.421	28.0327	308.461	164.768	34.4863	11.4954	21.5791	30.352	120.702	6.45357	19.0582	43.7633	2.52093	26.3185	1.00837		99.7836	0.216404	100
100924-1559MS-b	10MS312	BL-3	3	7	99.6286	53.8098	1.94356	13.93	12.1778	0.196247	4.86521	8.40523	3.03298	1.10536	0.318698		16.0536	33.4197	36.6506	321.172	490.895	27.3617	309.157	164.271	35.8428	11.914	20.0922	30.1888	121.462	4.84636	17.8709	40.9921	3.73573	24.5347	0		99.7849	0.215144	100
100924-1742MS	10MS141	BL-4	3	8	99.8844	53.8433	1.87836	13.9924	12.0763	0.198023	4.86509	8.65926	3.00511	0.972731	0.297458		14.6139	35.9804	37.8953	319.893	468.652	21.9712	315.055	160.854	33.6623	12.195	20.8626	33.4608	117.919	3.82985	18.4437	39.3063	3.32592	22.8783	1.00785		99.788	0.211958	100
100924-1742MS-a	10MS313	BL-4	3	8	99.6143	54.0784	1.89193	14.0165	11.7663	0.194914	4.86187	8.68773	3.0043	0.987781	0.296218		16.0977	35.9414	37.9663	326.004	467.238	23.286	315.981	160.268	33.4103	11.5417	20.4512	33.5116	117.442	5.06217	21.7673	43.7372	3.54352	23.7922	0.911191		99.786	0.214021	100
100925-1125MS	10MS142	BL-5	3	9	100.041	53.442	1.80906	14.0786	11.9061	0.203563	5.21204	8.85966	2.87923	1.12004	0.280007		15.0869	40.0652	37.5674	325.018	451.109	26.2772	316.126	152.967	31.9723	10.5908	20.1825	32.7716	115.5	4.39618	20.782	36.4684	3.19723	20.3823	2.29801		99.7902	0.209792	100
100925-1125MS-a	10MS314	BL-5	3	9	100.06	53.5542	1.82327	14.0522	11.7985	0.203518	5.22132	8.88968	2.84552	1.12283	0.280491		17.2252	40.8599	37.1544	323.274	447.255	25.3371	318.466	152.824	32.4475	11.3166	20.4299	31.3459	111.964	5.90866	15.022	36.7538	3.50513	20.4299	0		99.7915	0.208474	100
100925-1302MS	10MS143	BL-6	5	15	94.0032	55.6471	1.8487	15.0575	8.94399	0.169872	4.44306	8.88794	2.94954	1.48316	0.329635		11.1323	39.9157	36.907	314.11	634.74	35.3023	343.395	171.998	37.5087	11.4331	21.8634	27.1788	122.254	7.42151	23.6686	51.4491	4.01163	28.984	1.20349		99.7605	0.239517	100
100925-1302MS-a	10MS315	BL-6	5	15	94.1614	55.7236	1.84305	15.0356	8.90775	0.166213	4.45632	8.90081	2.92929	1.46959	0.328009		14.1201	43.4696	37.1156	308.221	640.043	35.6027	347.253	172.467	38.0233	12.0021	21.7852	28.9461	125.366	5.64803	21.0792	45.1842	4.43774	24.5084	1.91629		99.7602	0.239812	100
100930-1545MS	10MS144	BL-8	5	15	98.7662	54.3594	1.77329	14.3131	11.0428	0.199543	4.72674	8.6928	2.90479	1.44109	0.324599		12.3491	36.6456	36.746	307.321	541.15	34.1356	321.778	167.164	33.5332	10.8431	19.7786	28.7141	117.165	6.92752	21.7865	46.3843	3.41356	25.3005	2.71077		99.7782	0.221845	100
100930-1545MS-a	10MS145	BL-8	5	15	98.272	54.545	1.78662	14.3792	10.8148	0.197077	4.68753	8.65388	2.92124	1.46127	0.329764		14.582	37.7535	35.9557	312.715	544.828	33.5586	323.701	168.592	33.9581	12.185	19.5759	27.0666	117.955	6.19237	24.37	43.9458	5.09372	24.8693	0.199754		99.7764	0.223631	100
100930-1545MS-b	10MS316	BL-8	5	15	98.6993	54.3152	1.77361	14.3239	11.1055	0.202709	4.72666	8.68322	2.88246	1.4391	0.324549		16.1032	39.2515	36.6347	307.872	541.871	34.0179	323.17	166.366	33.8166	11.7754	20.5315	29.3883	118.761	5.23353	18.5186	47.7056	4.52901	25.0605	2.0129		99.7769	0.223064	100
070921-1455-MS	07MS023	CT-1	1	2	95.7287	55.1761	2.0424	14.4654	9.86043	0.20315	4.49923	8.70399	3.07358	1.42211	0.318717		14.0924	21.6882	37.7795	353.209	536.809	33.182	343.514	168.409	39.5786	11.6937	22.4878	28.8844	150.019	6.99621	20.7887	51.0723	3.4981	26.6855	1.69908		99.7652	0.23483	100
070913-1726-MS	07MS009	CT-2	3	7	90.9748	55.8703	2.18354	15.1652	9.06139	0.20761	3.99494	8.6083	2.98852	1.32511	0.349975		21.681	36.1687	40.8291	349.732	578.699	31.0017	343.552	184.085	44.679	12.968	23.7072	30.2925	140.724	5.47089	26.24	52.0748	3.9512	27.5571	0.810503		99.7549	0.245096	100
070915-1604-MS-a	07MS010	CT-3a	3	7	53.2172	46.8609	3.70684	25.9672	21.2785	0.0575013	0.892205	0.57341	0.046555	0.0634251	0.245537		20.806	57.9122	64.6708	432.552	824.818	6.36106	34.5883	306.126	119.27	20.9385	39.3591	52.0812	268.622	7.28872	61.8878	27.5646	6.89115	78.7181	1.72279		99.6921	0.307867	100
070915-1604-MS-c	07MS012	CT-3b	3	7	92.0356	55.8846	2.14302	15.0155	8.95238	0.177827	3.83049	8.80195	3.10257	1.45565	0.359115		12.3085	35.7148	40.1539	343.225	869.262	37.6317	368.649	179.684	39.8512	12.5103	24.5161	33.9997	136.705	4.84268	26.0294	45.9046	3.22846	28.1481	1.9169		99.723	0.276968	100
070915-1822-MS	07MS014	CT-3c	3	7	96.8071	54.4368	2.06719	14.2268	11.092	0.213415	4.06392	8.83045	3.02821	1.45138	0.350942		13.0807	34.0498	38.5432	330.612	624.779	31.853	333.209	174.343	37.3449	12.5814	20.5697	30.9543	130.308	5.89131	21.0689	46.4315	3.29514	23.5652	1.79735		99.7611	0.238919	100
070915-1604-MS-d	07MS013	CT-3d	3	7	98.8337	53.9601	2.00611	13.9656	12.178	0.200783	4.46021	8.5395	2.89175	1.23858	0.335902		18.164	33.5024	37.7407	323.218	512.628	28.7596	319.787	167.411	37.1352	11.5039	21.494	44.0981	127.854	4.54099	20.7877	41.0708	3.73371	25.9341	0.403644		99.7765	0.22351	100
070915-1604-MS-b	07MS011	CT-3e	3	7	99.2073	54.0034	2.00518	13.9022	12.4591	0.198277	4.38868	8.49725	2.8574	1.11703	0.335811		13.7889	34.4724	38.6293	327.589	596.98	31.8362	326.372	168.712	44.5099	11.3556	21.9001	30.6196	132.921	5.57641	23.3195	45.6252	2.73751	27.3751	2.02779		99.7643	0.235699	100
070919-1825-MS	07MS022	CT-4	3	7	98.4487	53.7162	2.02252	14.0062	12.3967	0.208015	4.52638	8.65104	2.85933	1.03236	0.341669		16.4955	30.4609	38.0509	330.314	603.855	27.0202	335.374	169.913	58.1895	11.8403	20.0374	30.3598	132.369	4.75636	26.919	46.8552	3.94677	30.8657	1.11319		99.7604	0.239621	100
070919-1453-MS	07MS021	CT-5	3	7	98.2831	53.8973	2.02666	14.0286	11.7142	0.206505	4.47513	8.69244	3.02176	1.36559	0.346692		14.443	33.966	38.0499	330.396	524.331	30.7786	320.735	169.83	36.9542	12.0524	21.1167	30.8782	126.501	4.48232	20.519	45.0224	3.68546	26.8939	1.29489		99.775	0.225008	100
070917-1630-MS	07MS016	CT-6	3	7	99.9592	53.5801	1.98577	13.8047	12.3185	0.213819	4.74715	8.50368	3.00369	1.28597	0.338634		14.5273	33.3331	38.0097	320.097	500.494	28.756	312.236	166.864	35.6216	11.6417	22.0894	28.8555	123.183	5.37309	19.7013	44.2783	3.98007	24.5769	1.09452		99.782	0.218003	100
070916-1811-MS	07MS015	CT-7	3	7	100.079	53.8878	1.95736	13.8305	12.1862	0.215523	4.71786	8.53073	3.08602	1.04332	0.329147		16.0741	30.7417	37.4727	318.066	497.895	22.9056	312.942	164.759	35.9657	11.3523	20.6954	29.0338	120.757	6.02778	20.1931	45.6102	2.31065	20.8963	1.10509		99.7845	0.215518	100
070908-1545-MS	07MS001	CT-8	5	13	96.0728	55.5804	1.88236	14.6354	9.75171	0.189395	4.24168	8.55626	3.03652	1.53053	0.35798		9.26017	37.6381	35.9454	313.651	634.471	36.8415	330.18	174.051	37.5385	11.2516	21.7066	28.9754	126.356	6.47216	25.6895	50.1841	3.68415	25.2912	1.29443		99.7622	0.237797	100
090921-1102MS	10MS071	DH-1	1	1	100.002	53.9224	2.07645	13.6495	12.669	0.213787	4.38637	8.15226	3.06972	1.29473	0.340984		10.8527	17.4848	34.5677	349.395	522.334	33.1609	325.78	170.226	35.1706	12.4605	21.3034	24.0165	126.011	6.63218	21.5043	48.1335	5.12486	25.1219	1.80878		99.7752	0.224771	100
090921-1102MS-a	10MS079	DH-1	1	1	99.8624	53.9998	2.07917	13.669	12.5787	0.213355	4.3772	8.16087	3.06202	1.29043	0.344156		10.8942	16.3413	37.0201	349.623	522.316	33.9939	326.221	170.575	35.4061	12.4073	20.7797	24.9154	127.805	5.64884	23.705	45.1907	4.64012	24.2093	3.42965		99.7747	0.225302	100
090921-1238MS	10MS072	DH-2	1	2	100.119	53.8411	2.02436	13.7145	12.5151	0.210312	4.54435	8.31957	2.96675	1.31998	0.324033		11.6206	18.633	36.8652	344.309	496.177	34.5611	323.272	167.396	34.3608	12.3218	20.4361	24.9441	126.724	5.00886	20.937	42.3749	4.90868	22.7402	2.00354		99.7801	0.21993	100
090921-1238MS-a	10MS080	DH-2	1	2	100.239	53.7902	2.01863	13.7035	12.6262	0.210374	4.55311	8.28462	2.96271	1.30874	0.323007		10.9934	18.6888	36.778	341.096	487.309	34.9791	322.307	166.401	33.6799	12.2927	21.687	25.4848	125.025	6.09636	19.1885	48.6709	4.59725	23.9857	1.89887		99.7811	0.218897	100
090921-1554MS	10MS073	DH-3	3	8	100.155	53.4449	1.87564	13.9508	12.1926	0.207246	5.03454	8.83024	2.87206	1.07984	0.298997		16.7502	36.749	36.3429	322.417	458.144	26.8004	317.645	162.02	33.9065	11.979	20.4048	33.1959	121.008	4.66976	19.8973	40.9112	3.45156	23.3488	1.42123		99.7868	0.213157	100
090921-1554MS-a	10MS331	DH-3	3	8	100.164	53.4467	1.87908	13.9437	12.183	0.206637	5.0409	8.85798	2.85778	1.0744	0.298864		15.2789	37.2926	37.1921	317.641	455.553	26.9391	315.228	162.439	33.6739	11.2582	20.3049	32.5682	118.311	4.92544	18.9981	36.8905	3.92025	23.8231	1.50779		99.789	0.210959	100
090921-1719MS	10MS074	DH-4	4	12	98.6235	53.8563	1.79373	14.3483	11.3902	0.19108	4.96429	9.01195	2.9074	1.03033	0.289255		17.7407	42.7204	37.2147	331.771	471.352	25.7954	331.262	156.098	33.3403	10.9095	19.9838	30.7913	119.189	6.21944	18.6583	43.9439	5.19986	20.7994	0		99.7828	0.217171	100
090921-1819MS	10MS075	DH-5	5	16	100.025	53.8029	1.72082	14.1731	11.696	0.201063	5.08033	8.6902	2.98199	1.1292	0.309071		15.8555	41.1439	35.5242	303.762	514.499	28.299	318.313	158.053	32.5137	10.7376	20.1705	26.6934	116.809	4.81685	17.3607	45.1579	3.41193	23.4821	1.50526		99.7846	0.215352	100
090921-1819MS-a	10MS332	DH-5	5	16	99.8995	53.8209	1.72046	14.1942	11.6733	0.201201	5.0504	8.70799	2.97543	1.13008	0.309921		14.6972	40.4922	34.1934	302.242	523.3	28.2946	318.639	158.67	33.2936	11.0979	21.2959	27.2948	115.178	5.39897	19.2963	43.7916	2.99943	24.9952	0.799847		99.7839	0.216134	100
080531-1610MS	08MS018	PG-1	1	3	98.5416	54.0144	1.92757	14.1446	11.6845	0.190571	4.73536	8.89809	2.90313	1.00853	0.278658		14.8645	25.3511	37.8739	337.607	463.141	25.7583	328.75	155.975	35.8377	11.912	21.3804	32.7834	117.083	6.71957	18.7333	41.4373	3.66522	22.5004	2.34167		99.7853	0.214663	100
090616-1816MS-a	10MS042	PG-2	1	3	96.692	55.2289	1.94942	14.4396	9.50414	0.196536	4.88152	9.01597	2.90782	1.34442	0.292895		15.0451	28.2727	38.1681	333.517	647.243	29.4844	340.383	163.982	37.2594	13.4295	21.5074	33.1194	121.068	6.9672	18.7811	43.0149	2.72629	21.6084	0.605843		99.7612	0.238753	100
090616-1816MS-b	10MS043	PG-2	1	3	97.3146	54.8024	1.92344	14.3693	10.3338	0.192505	4.70824	8.97663	2.8885	1.29639	0.284274		16.8466	27.7414	38.2327	338.647	522.447	29.1537	335.318	160.194	35.9125	11.9036	20.3773	37.0222	119.036	6.35531	20.2765	42.6713	2.92546	23.0002	0.907901		99.7754	0.224569	100
080531-1715MS	08MS019	PG-3	1	3	98.4926	53.7158	1.95542	14.1078	12.0622	0.181482	4.73901	9.03709	2.854	0.859845	0.277585		15.5836	25.1815	39.7331	342.118	428.499	20.5374	327.772	153.669	34.4698	11.7651	21.0534	33.9538	116.31	4.74733	22.1886	37.3595	2.88968	21.0534	0.103203		99.7902	0.209813	100
090617-1010MS	10MS045	PG-4	4	11	97.1191	54.2133	1.82824	14.5596	10.8517	0.184044	4.74081	9.16708	2.96841	0.990478	0.278491		18.3264	49.613	38.7791	331.293	459.983	22.174	324.408	159.47	34.8304	12.5551	22.4777	40.7029	115.527	4.86005	20.3515	40.5004	2.63253	24.5027	1.31626		99.7821	0.217861	100
090616-1909MS	10MS044	PG-5	4	11	95.0275	54.6527	1.86871	14.8797	9.55483	0.183327	5.00314	9.32661	2.96812	1.05009	0.28111		19.2583	51.1201	39.5248	342.717	536.509	24.098	342.112	159.007	34.3826	11.192	21.0732	41.8439	122.204	6.15055	19.9641	41.7431	2.92403	23.9972	2.41989		99.7683	0.231655	100
100927-1642MS	10MS104	SG-1	1	2	100.179	53.7704	1.97997	13.7766	12.5279	0.207105	4.63412	8.48143	2.94628	1.14986	0.309918		12.5481	18.215	36.2276	342.543	467.215	31.4715	326.656	164.137	34.2037	11.5362	20.1377	26.7153	120.624	5.5657	20.6437	46.9542	3.94658	27.9297	1.41672		99.7837	0.216327	100
100927-1642MS-b	10MS114	SG-1	1	2	99.8512	53.987	2.00078	13.7986	12.3429	0.207862	4.55919	8.40831	2.96455	1.20115	0.313843		11.1581	18.9989	35.9873	339.266	477.585	32.3685	321.875	164.355	33.4742	11.0575	20.8083	26.0355	122.236	5.83034	17.8931	45.2354	4.72459	26.3371	0.804185		99.7842	0.215841	100
100927-1642MS-a	10MS283	SG-1	1	2	100.25	53.7605	1.98432	13.7576	12.5769	0.207568	4.6167	8.44666	2.95617	1.16646	0.311961		11.3799	19.8394	36.2547	341.599	465.57	32.5285	323.17	163.75	33.8377	11.3799	20.7457	26.0832	125.179	5.74032	17.8252	43.9084	3.62547	22.6592	3.72617		99.7848	0.215167	100
100928-1505MS	10MS105	SG-2	3	8	99.5688	53.7747	1.90271	14.0068	12.0104	0.204501	4.83822	8.66668	3.02339	1.05668	0.303317		16.7159	35.5592	37.5854	326.314	473.616	26.3401	312.131	161.181	33.4317	11.5491	20.4643	31.4056	117.72	4.25495	16.4119	37.4841	2.73532	21.4773	0.101308		99.7874	0.212587	100
100928-1505MS-a	10MS284	SG-2	3	8	99.6147	53.7339	1.89472	14.0119	12.0375	0.201088	4.87096	8.6546	3.02334	1.05905	0.300686		16.1112	35.8474	36.7537	319.002	472.663	25.8786	310.846	159.803	32.9273	11.2778	21.146	31.7189	117.108	5.84031	19.5348	41.6878	3.52433	24.1668	0.100695		99.7877	0.212263	100
110502-1242MS	10MS113	SG-2	3	8	98.986	53.6775	1.91431	14.0886	11.9462	0.20694	4.83183	8.85996	2.91986	1.02858	0.311557		15.9628	35.9668	37.1791	322.286	469.689	25.6617	318.144	160.335	33.1379	11.3154	21.5194	31.0163	122.247	4.54636	18.9937	47.6863	3.53606	23.54	1.91957		99.7853	0.214686	100
110502-1242MS-a	10MS293	SG-2	3	8	99.4265	53.6629	1.92805	13.99	12.0684	0.208695	4.8899	8.78898	2.86288	1.07328	0.313547		14.4213	34.0866	39.129	321.705	456.438	28.3383	317.369	163.071	34.8934	11.7992	21.5815	30.557	121.219	5.95003	19.1611	43.163	3.42883	24.8086	1.91611		99.7866	0.213385	100
100927-1823MS	10MS106	SG-3	3	9	99.1346	53.5331	1.85306	14.1626	11.8789	0.204512	5.0833	8.98476	2.80424	0.998409	0.286916		16.8977	40.5746	36.6285	325.204	427.602	25.903	319.234	156.126	32.9859	11.029	20.8438	34.3013	117.575	5.16037	22.5639	43.1042	2.73196	23.677	1.92249		99.7898	0.210236	100
100927-1823MS-a	10MS285	SG-3	3	9	98.9831	53.5343	1.85123	14.1919	11.7181	0.205818	5.17411	9.04698	2.80495	0.975828	0.286915		18.1386	41.4453	37.0879	322.037	424.89	25.6373	319.706	157.269	32.7306	11.0453	20.8746	33.4399	114.506	5.16799	23.8133	44.1812	3.85066	23.8133	1.824		99.7901	0.2099	100
100928-1808MS	10MS107	SG-4	4	10	100.052	53.6121	1.83551	14.0337	11.8989	0.204983	5.00143	8.73201	2.89959	1.24646	0.319407		17.9967	42.5557	36.9877	308.231	487.204	31.2208	311.015	162.467	33.7065	11.5338	20.1841	33.806	118.321	5.36918	19.0904	47.2289	3.77831	25.3545	2.18744		99.7841	0.215916	100
100928-1808MS-a	10MS286	SG-4	4	10	100.154	53.5436	1.83	14.0253	12.0129	0.203918	4.98733	8.72328	2.89504	1.24352	0.320854		16.9301	40.7317	36.6486	304.542	486.191	31.9679	310.716	162.13	34.3581	11.3531	20.5152	36.9474	118.112	3.88395	20.814	41.4288	3.28642	23.9013	1.39424		99.7857	0.214292	100
100928-1840MS	10MS108	SG-5	4	10	99.4731	53.6609	1.8276	14.1456	11.8885	0.191906	5.01018	8.85742	2.83997	1.07542	0.289155		18.4233	41.6043	34.4172	327.065	457.647	27.5338	315.423	159.939	33.4049	11.2362	19.7393	36.1381	115.5	5.36503	19.3344	42.4141	3.7454	22.5736	0.809816		99.7866	0.213441	100
100928-1840MS-a	10MS287	SG-5	4	10	100.02	53.5344	1.83081	14.0468	12.0819	0.193365	5.06693	8.86948	2.82001	1.05638	0.286769		17.5069	42.8058	36.0257	325.648	454.369	28.3348	313.909	160.092	32.4838	12.2447	20.138	37.3412	114.554	4.95859	18.2152	43.3118	3.74424	21.4535	2.3275		99.7868	0.213187	100
100928-1657MS	10MS109	SG-6	4	11	99.6782	53.5208	1.79036	14.171	11.7686	0.196398	5.15542	9.02812	2.80889	1.07243	0.27781		18.4407	48.2683	37.0829	325.886	429.779	28.6183	310.569	155.688	32.246	10.9838	20.053	38.796	112.76	4.03075	17.9368	42.1214	3.02306	21.7661	3.32537		99.7899	0.210119	100
100928-1657MS-a	10MS288	SG-6	4	11	99.3994	53.5413	1.78954	14.2203	11.6792	0.196975	5.17404	9.05626	2.7947	1.06167	0.27712		17.9692	47.3458	37.0489	321.427	427.627	28.3671	310.625	154.454	32.1023	10.4989	21.8053	38.9669	114.074	4.94658	18.5749	38.866	4.13898	22.411	1.81711		99.791	0.208978	100
110430-1712MS	10MS112	SG-7	4	12	99.9183	53.5449	1.79766	14.1181	11.8614	0.187162	5.21909	8.98124	2.75848	1.04084	0.281038		18.3592	44.2661	37.1264	329.344	429.299	26.2128	314.146	155.237	32.0266	10.6075	20.3991	35.1885	116.377	4.38581	19.0732	39.8802	4.69179	23.357	1.63193		99.7899	0.210133	100
110430-1712MS-a	10MS292	SG-7	4	12	99.9557	53.5596	1.79449	14.1169	11.8718	0.18774	5.203	8.98818	2.75747	1.03325	0.279012		16.7061	43.8026	36.5701	326.584	429.571	25.8741	313.036	155.958	31.6805	11.3072	18.8453	36.1626	113.174	4.48213	19.3546	40.0335	2.85226	21.9013	1.32426		99.7915	0.208543	100
100928-1248MS	10MS110	SG-8	5	13	100.164	54.3781	1.82448	14.0123	11.8249	0.199268	4.57921	8.35927	2.94942	1.28464	0.367066		13.6167	33.9914	33.7896	295.231	550.821	35.6052	317.522	172.378	36.1095	12.3055	20.9798	25.4179	120.634	6.85879	21.4841	44.8847	5.14409	24.1066	1.7147		99.7787	0.221266	100
100928-1248MS-a	10MS289	SG-8	5	13	99.9037	54.395	1.81795	14.0638	11.7438	0.198229	4.59026	8.37761	2.95461	1.27267	0.366148		12.7546	35.6527	34.7488	294.561	544.933	35.0501	315.451	171.635	34.8492	11.9512	19.9856	25.8105	119.612	6.72881	20.789	44.8922	4.41892	25.8105	1.0043		99.7801	0.219905	100
100928-1248MS-b	10MS290	SG-8	5	13	99.7012	54.4678	1.82092	14.0934	11.6253	0.19893	4.58962	8.36525	2.95418	1.2954	0.368258		13.6482	33.9688	33.6655	297.126	544.41	36.0918	315.829	172.169	35.3841	11.6262	19.3096	27.1952	121.418	5.96475	21.736	47.9202	4.145	26.1842	2.02195		99.779	0.22101	100
100928-1102MS	10MS111	SG-9	5	14	100.046	54.9031	1.7433	14.1397	11.1343	0.207802	4.67791	8.2878	2.97728	1.38789	0.316664		16.4715	38.0652	34.7508	295.783	564.951	37.0608	309.242	173.252	37.2617	11.8514	20.0872	27.6198	122.13	6.22702	21.895	47.3053	4.62005	27.8207	0.803486		99.7757	0.224303	100
100928-1102MS-a	10MS291	SG-9	5	14	100.125	54.9293	1.73481	14.138	11.0913	0.20649	4.70784	8.30207	2.96833	1.38147	0.317194		15.0182	37.0449	33.1401	297.36	565.985	37.7457	309.875	172.309	35.6432	11.8143	19.4235	28.2342	118.143	7.20873	20.8252	45.8555	5.00606	25.9314	2.30279		99.7768	0.223163	100
080602-1824MS	09MS009	WC-1	3	9	98.7887	53.6313	1.84985	14.228	11.322	0.261104	4.55096	9.63622	2.90567	1.09588	0.29845		18.0086	38.6776	37.4498	330.295	510.381	26.399	327.123	160.134	33.5615	11.6647	20.8736	31.9244	117.056	6.65092	17.1901	41.338	3.06965	22.6131	0		99.7794	0.220568	100
080722-1922MS	09MS010	WC-2	3	9	98.4128	53.8652	1.83746	14.314	11.3459	0.201949	4.84404	8.98544	3.03142	1.061	0.295689		19.3208	38.9451	38.237	326.836	479.076	26.5029	327.139	160.434	33.7862	12.341	20.0289	32.2688	117.746	5.86706	20.8382	43.4971	2.12428	22.8613	3.03468		99.7821	0.217949	100
110428-1137MS	10MS244	WW-1	3	8	99.7664	53.7873	1.86641	14.032	11.988	0.191937	5.19727	8.38954	2.98619	1.0561	0.292928		16.8571	37.9793	36.6591	318.66	468.952	25.9965	305.56	157.299	33.7142	11.475	19.9036	31.8863	120.234	4.77279	20.6144	43.3613	3.35111	24.981	3.35111		99.7877	0.212261	100
110428-1137MS-a	10MS248	WW-1	3	8	99.9816	53.7973	1.86661	13.995	12.0204	0.191788	5.19925	8.40494	2.96773	1.05226	0.293228		16.2781	35.286	36.9037	320.001	468.222	25.8832	307.464	157.827	34.0728	10.4139	20.6256	30.6351	116.676	5.05531	18.6035	43.6778	4.85309	26.1865	1.31438		99.7885	0.211543	100
06BV-G523	06BV-G523	WG-1	5	13	99.2573	54.3779	1.79811	14.1976	11.2419	0.202022	4.82645	8.43486	2.93815	1.4237	0.336964		15.4278	36.821	36.2039	310.202	551.184	34.044	318.944	165.695	35.1754	10.4909	19.8504	24.2731	117.663	5.75971	20.7761	44.3292	5.1426	26.1244	0		99.7776	0.222351	100
97SH-X49A	97SH-X49A	SH-1	3	7	100.135	53.4901	1.97078	13.7992	12.4034	0.215577	4.85637	8.56058	3.00498	1.14955	0.330586		20.5283	34.6478	37.8522	322.545	494.282	29.6409	317.438	165.929	35.9496	13.3184	21.6298	30.5421	123.47	5.00691	20.8287	38.0525	4.50622	23.3322	1.50207		99.7811	0.218941	100
99SH-X98	99SH-X98	SH-2	3	7	99.4464	53.4996	1.98466	13.8943	12.4101	0.211568	4.76717	8.59858	2.94925	1.13837	0.330215		21.0575	32.4801	37.8438	320.729	476.276	26.9178	318.246	166.771	35.758	12.3166	20.3622	29.5996	121.676	5.761	20.9581	41.3203	4.07243	23.5407	1.7879		99.7839	0.216149	100
00SH-X111	00SH-X111	SH-3	3	7	99.4374	53.372	1.98795	13.8905	12.5944	0.227326	4.6772	8.60037	3.0034	1.08645	0.340238		22.0389	33.3054	37.1597	322.38	494.837	27.7709	322.281	168.701	36.962	11.563	22.0389	29.6487	125.117	8.00514	21.6435	40.3222	3.85433	23.8178	0.889461		99.7798	0.220249	100
97LC-Q70	97LC-Q70	LC-1	5	13	99.8254	54.3815	1.81708	14.0779	11.4751	0.200194	4.68054	8.44447	3.07631	1.26762	0.355156		21.1532	35.3871	35.6837	302.372	553.542	32.6194	317.792	169.72	36.0791	12.4547	19.967	26.6886	122.57	7.01812	19.374	50.1153	3.75618	26.9852	0		99.7759	0.224103	100
00LC-Q447	00LC-Q447	LC-2	5	13	100.073	54.4049	1.81283	14.0428	11.5232	0.204746	4.69791	8.43382	3.03682	1.26853	0.348758		22.0402	36.8654	35.9759	304.214	561.481	34.8887	318.248	170.391	34.5922	12.1567	21.2495	27.5749	120.875	9.29047	21.0518	46.2547	4.74407	23.6215	0.988348		99.7743	0.225664	100
T1248	10MS201	WV-01	3	7	99.4314	53.7438	2.00381	13.8657	12.0369	0.217165	4.82074	8.62669	3.0021	1.12534	0.338061		19.4311	34.4323	37.8554	326.503	494.336	27.9889	315.328	168.94	36.0432	12.5849	22.3508	30.3045	123.131	6.3428	18.223	43.4935	2.21495	23.9617	2.31562		99.7803	0.219676	100
T3407	10MS215	WV-02	3	7	94.9844	54.6731	2.09905	14.5125	10.3413	0.190728	4.32443	8.7868	3.03718	1.44485	0.352272		21.0622	34.9692	38.0933	340.623	545.097	31.8452	339.312	178.373	39.5041	12.2947	22.3722	32.0467	149.854	6.34888	21.6668	47.0623	4.23259	27.6126	1.81397		99.7623	0.237664	100
T3421	10MS217	WV-03	4	10	97.3005	54.7809	1.88425	14.4356	10.3817	0.189666	4.58592	8.86319	2.93524	1.4097	0.305348		21.8307	40.0397	37.9271	338.929	515.989	33.6012	327.662	167.503	36.418	11.6699	22.1325	33.7018	127.966	6.84096	22.8367	43.259	2.91747	24.547	1.20723		99.7716	0.228443	100
T3445	10MS220	WV-04	3	9	94.4593	55.1752	1.97651	14.8119	9.66332	0.16081	4.50549	8.96058	3.16402	1.05264	0.305574		14.4388	40.1643	38.4358	327.314	494.784	24.5053	349.176	165.64	37.4189	11.3884	23.7936	32.2332	129.848	5.49082	21.9633	36.8088	2.44037	23.0818	1.42355		99.7761	0.223939	100
070921-1250RW	07RW004	WV-05	3	8	99.6673	54.0517	1.9144	13.9708	11.7924	0.210882	4.69282	8.86948	3.03698	0.940186	0.303917		22.6028	36.6287	37.1332	325.723	473.448	18.8693	318.861	158.422	38.7477	11.0996	21.7956	33.6015	125.022	4.84346	18.0621	44.0957	2.92626	23.9146	1.21087		99.7836	0.216395	100
070924-1633RW	07RW006	WV-06	3	7	100.15	53.7683	1.97799	13.7848	12.3861	0.225854	4.64257	8.57334	3.09012	1.00864	0.327876		16.6922	32.9845	36.183	322.049	490.869	20.8902	313.853	163.423	34.4838	11.3946	21.5899	27.8869	120.943	5.09761	18.6912	40.2811	2.79869	23.0892	0.999531		99.7856	0.214422	100
070926-1227RW	07RW012	WV-07	3	7	96.9695	54.2209	2.04475	14.2339	11.16	0.198342	4.41608	8.79197	3.00888	1.35007	0.342413		14.9446	35.6063	39.1168	329.985	571.908	30.2905	325.572	171.312	38.9162	12.1362	20.0599	30.9925	129.687	5.11528	20.6617	47.2411	3.51048	28.0839	3.61078		99.7673	0.232707	100
T2128	10MS206	AB-1	5	13	99.6167	54.3663	1.81343	14.1173	11.5474	0.19782	4.648	8.46739	2.97681	1.29408	0.349132		15.7	36.0897	35.9877	304.315	550.52	33.541	317.976	169.438	35.7838	11.4182	19.9819	27.0163	119.993	6.21884	18.3507	46.2845	3.56819	25.3851	0.815586		99.7777	0.222333	100
T2152	10MS208	AB-2	5	15	99.8977	54.2072	1.73445	14.1759	11.6628	0.18919	4.74893	8.62459	2.98744	1.14164	0.308775		16.373	38.1696	37.044	309.859	527.621	26.7085	319.99	162.502	33.053	11.7681	19.8523	27.4248	115.43	6.44688	21.8989	45.4351	2.14896	25.1735	1.43264		99.7809	0.219084	100

## Sheet: SB.mn
Supplemental File 2: Alteration, mass analysis and magmatic compositions of the Sentinel Bluffs Member, Columbia River flood basalt province, by M. G. Sawlan
Mass-normalized Major and Trace Element Abundances						Major elements (wt. %)											Trace elements (ppm)
Chem_ID_field	Chem_ID_lab	SB_Sec_Flow	SB_Series	SB_Group	MIs	SiO2mn	TiO2mn	Al2O3mn	FeOmn	MnOmn	MgOmn	CaOmn	Na2Omn	K2Omn	P2O5mn		Nimn	Crmn	Scmn	Vmn	Bamn	Rbmn	Srmn	Zrmn	Ymn	Nbmn	Gamn	Cumn	Znmn	Pbmn	Lamn	Cemn	Thmn	Ndmn	Umn		Total.M-oxmn	Total.Tr-oxmn	Total.M+Tr-oxmn
080721-1914MS	10MS027	AC-1	3	9	99.1523	53.3478	1.86117	14.0007	11.4598	0.202522	4.95891	8.71893	2.91373	1.17785	0.297044		17.5939	38.0868	38.3867	328.786	465.039	26.091	316.691	159.245	33.3885	11.3961	21.4926	32.8886	119.159	4.39848	16.9941	40.6859	2.99896	21.6925	0.399862		98.9384	0.213889	99.1523
080721-1807MS	10MS028	AC-1	3	9	99.5376	53.4153	1.83945	14.0361	11.7081	0.203793	5.0214	8.74098	2.94456	1.11984	0.294434		17.5819	39.3594	37.8609	328.661	465.819	26.5726	319.67	157.837	34.1647	11.6879	21.1781	31.6673	116.48	5.19464	19.4799	37.2615	2.49742	21.4778	0.399588		99.3239	0.213762	99.5376
080721-1701MS	10MS029	AC-2	3	9	97.0855	52.5796	1.81137	14.0818	10.45	0.186144	4.69368	8.93764	2.81186	1.03974	0.281876		20.6452	39.3053	36.6254	326.056	445.262	21.9356	327.544	152.953	32.0597	11.0174	21.5385	30.9678	116.427	5.45907	21.5385	40.9927	3.3747	23.6229	1.19107		96.8737	0.211797	97.0855
CB0119	10MS173	BG-01	1	1	99.5353	53.8137	2.04271	13.7049	12.448	0.208013	4.40577	8.17924	3.0227	1.1585	0.33077		11.2323	16.5528	35.4703	348.397	510.673	30.8394	321.794	167.104	33.7953	12.2175	19.9028	26.7012	124.934	5.71466	20.9866	40.8893	5.32054	24.5336	2.16763		99.3143	0.220974	99.5353
100514-1258MS	10MS174	BG-02	1	2	99.8727	53.7105	1.96317	13.8345	12.3398	0.208621	4.71475	8.56052	2.98252	1.04731	0.296676		12.4583	20.6309	37.8731	334.679	471.421	24.7172	322.32	161.858	33.5875	11.2623	20.8302	27.1092	119.799	5.68097	20.6309	45.8464	3.78731	26.1125	1.69433		99.6584	0.214272	99.8727
100514-1258MS-a	10MS175	BG-02	1	2	100.006	53.8472	1.95564	13.8468	12.3518	0.206987	4.71264	8.56873	2.95523	1.05264	0.294594		12.606	19.852	36.4285	335.897	476.052	25.2121	323.489	161.596	33.7485	11.1171	22.135	27.3958	120.006	5.95561	17.4698	43.2775	3.07707	22.7306	0.893342		99.7922	0.213825	100.006
100514-1106MS	10MS178	BG-03	1	2	99.7327	53.7525	1.94933	13.8571	12.3587	0.208066	4.6096	8.4742	2.86117	1.14353	0.30584		12.4183	18.6274	36.1532	334.392	456.171	29.9441	323.977	161.237	33.7497	11.3167	20.9308	26.6392	120.177	5.30781	21.0309	46.3682	4.00589	24.3358	3.00442		99.52	0.212712	99.7327
100514-1106MS-a	10MS259	BG-03	1	2	99.7315	53.7532	1.94988	13.8562	12.3405	0.208627	4.63256	8.49328	2.86185	1.1183	0.305154		13.12	20.5312	35.9547	336.913	456.094	30.3462	324.193	160.344	34.4524	12.3187	21.032	24.337	119.382	4.50686	19.6299	39.8606	4.90747	23.8363	1.20183		99.5195	0.212015	99.7315
100813-1501MS	10MS176	BG-04	2	4	99.7157	53.4674	2.03904	13.7109	12.5795	0.212137	4.59042	8.36578	2.88656	1.29335	0.351166		14.4148	32.4086	35.6892	321.302	499.549	30.9174	313.945	172.083	36.2856	12.0289	20.8767	28.0344	127.248	5.76594	23.362	41.5545	3.97651	25.7479	2.78356		99.4962	0.219552	99.7157
100813-1501MS-a	10MS177	BG-04	2	4	99.8247	53.568	2.03795	13.7127	12.5715	0.211855	4.61416	8.4187	2.88288	1.24118	0.346984		14.9523	33.3935	35.7859	321.475	493.228	30.0043	316.79	170.955	35.9853	11.7625	21.4317	27.5123	124.005	4.78475	20.2355	46.5516	3.98729	26.9142	1.19619		99.6059	0.218816	99.8247
100813-1501MS-b	10MS258	BG-04	2	4	99.8899	53.6065	2.02298	13.7371	12.5707	0.210857	4.63954	8.42933	2.88288	1.22384	0.346181		14.327	32.3609	37.7711	324.411	489.722	29.3552	316.496	170.22	35.3666	12.6238	21.1398	28.0528	124.935	6.21169	23.2437	49.1926	4.60867	26.4498	3.20603		99.6699	0.219983	99.8899
100512-1730MS	10MS179	BG-05	2	5	99.5534	53.3229	1.96181	13.8367	12.2889	0.209792	4.8138	8.59903	2.84782	1.13139	0.326897		15.953	37.4896	37.7887	321.453	464.233	27.6186	316.368	162.023	35.5952	11.0674	21.3372	31.1084	123.237	3.68913	19.1436	42.3752	4.18767	24.6275	1.5953		99.3391	0.214325	99.5534
100512-1624MS	10MS180	BG-06	2	5	99.7488	53.3287	1.9871	13.7955	12.4738	0.210973	4.81441	8.56426	2.96746	1.05597	0.332053		15.3011	36.642	37.1453	323.939	494.868	26.3742	316.49	165.392	35.736	11.3751	20.435	28.7901	121.603	5.63723	22.2469	45.8025	3.52327	25.1662	1.20798		99.5303	0.218526	99.7488
100512-1624MS-a	10MS260	BG-06	2	5	99.9194	53.3909	1.97846	13.8096	12.5641	0.211384	4.81393	8.58198	2.95791	1.05898	0.334262		16.2064	37.4148	37.815	324.228	495.997	26.0103	314.325	165.366	34.5137	11.4045	21.2084	29.6117	122.348	6.50258	17.1068	39.8158	3.60143	26.5105	1.60063		99.7015	0.217839	99.9194
100512-1349MS	10MS181	BG-07	3	8	99.8129	53.5373	1.87328	13.981	12.1059	0.20543	4.94955	8.71518	2.85119	1.07667	0.307951		15.5501	34.3896	37.38	312.297	456.634	26.0165	320.072	158.092	33.4924	10.9648	20.7334	28.4088	118.32	3.78784	17.444	41.9652	3.4888	22.2286	1.79424		99.6034	0.209406	99.8129
100512-1349MS-a	10MS261	BG-07	3	8	99.2882	53.3633	1.86908	13.9878	11.8242	0.203669	4.90606	8.7016	2.84168	1.07262	0.308722		16.9715	34.7418	37.0379	311.078	456.335	26.855	318.566	156.338	33.7434	10.7819	21.9632	28.8516	119.699	4.69213	17.0714	41.8299	2.89515	22.662	0.998326		99.0788	0.20938	99.2882
100512-1349MS-b	10MS262	BG-07	3	8	99.403	53.4369	1.87002	13.9863	11.7842	0.204686	4.95529	8.70716	2.86341	1.07514	0.308209		15.7928	35.084	36.2834	314.956	460.989	26.7877	317.955	156.828	33.4847	11.0949	20.4906	28.2871	119.245	5.69739	21.3902	45.5792	4.19808	25.7882	2.3989		99.1913	0.21167	99.403
100512-1256MS	10MS182	BG-08	3	8	99.6456	53.3522	1.87663	13.9755	12.0494	0.203886	5.02311	8.80536	2.86291	0.992133	0.294367		16.9113	36.9247	37.6252	314.71	461.108	23.2155	315.611	158.306	33.9227	11.2075	20.4136	30.3203	115.777	5.00335	17.4116	40.427	2.60174	24.8166	1.30087		99.4355	0.210091	99.6456
100512-1256MS-a	10MS263	BG-08	3	8	99.5788	53.4619	1.87579	13.9769	11.7707	0.204523	5.04902	8.83514	2.89248	1.00515	0.295213		17.4539	36.6229	38.338	323.25	457.736	24.3144	314.573	157.388	33.9998	11.1987	20.4806	31.2757	117.334	5.95248	19.6734	43.3825	2.21957	23.5072	2.42135		99.3668	0.211967	99.5788
100512-1051MS	10MS183	BG-09	4	10	100.357	53.855	1.82803	14.0547	12.231	0.194604	5.03223	8.70767	2.93266	1.01405	0.289954		19.072	43.5644	36.2368	326.231	485.934	24.2917	313.583	159.502	33.2254	11.2424	19.6743	35.7349	115.436	5.92235	20.7784	41.9584	4.41667	21.983	1.9072		100.14	0.216706	100.357
100512-1051MS-a	10MS264	BG-09	4	10	99.4945	53.7807	1.82296	14.0629	11.5802	0.186743	4.95923	8.61484	2.94318	1.03574	0.291176		18.5182	43.3425	35.7351	325.119	485.476	23.423	310.805	160.157	32.7321	11.7115	20.5201	37.4367	115.713	6.00589	19.3189	45.6448	4.70461	24.2238	0		99.2777	0.216717	99.4945
100512-1051MS-b	10MS265	BG-09	4	10	99.995	53.8265	1.81623	14.0739	11.8994	0.194791	5.04807	8.70489	2.92885	0.999773	0.288692		17.652	43.1155	35.9127	322.707	476.097	22.7244	311.345	158.158	32.7678	11.4637	19.5795	36.1156	114.84	6.79704	16.739	42.7097	3.85504	25.1592	0.304345		99.7811	0.213953	99.995
100511-1800MS	10MS184	BG-10	4	12	99.3894	53.6988	1.80264	14.096	11.5557	0.195152	4.88313	8.73003	2.75028	1.17627	0.288216		18.8663	41.1266	35.4368	325.22	453.59	29.0482	315.637	156.82	32.6417	11.18	19.4653	34.5384	116.891	4.69163	22.1604	43.722	4.5918	24.2567	1.49733		99.1762	0.213248	99.3894
100511-1800MS-a	10MS266	BG-10	4	12	99.5887	53.7503	1.79685	14.1055	11.708	0.196123	4.8717	8.73445	2.76454	1.15753	0.289971		18.437	43.6876	36.0723	328.559	453.208	29.4591	315.332	157.917	32.4651	11.3227	20.7416	33.2667	113.528	5.61125	19.7396	44.1886	4.00803	25.2506	1.40281		99.3749	0.213774	99.5887
100511-1303MS	10MS185	BG-11	5	15	99.1903	54.0479	1.7506	14.1375	11.1837	0.190923	4.65723	8.49721	2.9322	1.2534	0.319515		15.5702	38.8271	35.5751	306.281	536.287	31.7318	318.599	164.67	33.7027	11.2342	20.3004	28.3812	117.171	7.0953	19.1179	45.2326	4.7302	24.0452	0		98.9702	0.220098	99.1903
100511-1303MS-a	10MS267	BG-11	5	15	98.8868	53.9293	1.74681	14.1426	11.0216	0.189905	4.65739	8.4797	2.93973	1.24208	0.318298		14.993	38.3265	34.4541	305.42	533.195	31.4754	316.541	161.944	33.7591	11.4185	20.7519	28.0002	114.582	7.84402	22.2413	44.3833	4.36882	26.908	3.37591		98.6674	0.219399	98.8868
100511-1401MS	10MS186	BG-12	5	15	100.042	54.3006	1.74815	14.1408	11.5508	0.196933	4.873	8.51902	2.96857	1.20826	0.317256		15.8921	38.439	35.9558	308.803	531.888	30.5923	317.941	161.603	33.3734	10.5285	20.9577	27.7118	116.31	4.56897	20.759	45.5904	5.0656	21.2557	1.48988		99.8234	0.218999	100.042
100511-1620MS	10MS187	BG-13	5	15	98.9869	53.8554	1.74458	14.1456	11.0338	0.189466	4.77665	8.58151	2.91608	1.21478	0.310448		15.3242	39.3486	35.0974	307.077	533.776	30.3518	319.435	160.459	33.2189	10.4798	21.5527	27.8802	115.179	5.23989	18.9822	41.227	4.44896	24.6176	3.16371		98.7683	0.218649	98.9869
110427-1738MS	10MS147	BL-1	2	5	98.3624	53.1892	2.00134	13.7723	11.6812	0.203624	4.26254	8.49525	2.86126	1.33815	0.337883		15.9574	37.2339	36.4459	324.171	494.186	30.3387	314.616	169.03	35.9534	12.2143	20.784	30.4372	123.325	4.92512	19.208	45.3111	3.84159	26.7926	1.47754		98.1428	0.219627	98.3624
110427-1738MS-a	10MS320	BL-1	2	5	98.3057	53.131	1.99277	13.7863	11.6718	0.203338	4.28468	8.49659	2.85388	1.3246	0.340337		15.6186	38.058	36.1798	322.257	498.214	30.9406	314.547	167.851	36.0809	11.8622	20.0669	31.0395	124.059	5.63456	22.5382	46.4604	3.16326	26.9866	2.4713		98.0853	0.22043	98.3057
100924-1440MS	10MS139	BL-2	2	6	99.781	53.3412	1.92153	13.9024	12.2628	0.208596	4.84141	8.55622	2.8845	1.31777	0.329541		16.7662	39.5842	36.7071	319.451	482.947	28.6712	317.765	162.999	34.4253	11.6074	20.1393	29.3657	121.63	5.15884	18.552	37.6	3.37309	21.9251	0.59525		99.5659	0.21511	99.781
100924-1440MS-a	10MS310	BL-2	2	6	99.8554	53.4135	1.92181	13.9019	12.3017	0.210453	4.8278	8.5714	2.83873	1.32176	0.329856		16.7066	41.667	36.5954	315.933	478.922	29.7337	317.624	162.094	35.0043	10.7399	20.5849	30.0321	121.322	5.86719	21.4799	45.5453	3.28165	26.7504	2.18777		99.6389	0.216578	99.8554
100924-1559MS	10MS140	BL-3	3	7	100.011	53.7283	1.93744	13.8764	12.3565	0.19616	4.85678	8.37801	3.05046	1.09972	0.318829		13.4109	32.1261	36.83	315.256	489.498	28.0228	307.75	164.033	34.7282	12.1098	20.7168	28.223	118.296	5.4044	18.3149	41.1335	2.80228	22.3182	2.7022		99.7986	0.212886	100.011
100924-1559MS-a	10MS311	BL-3	3	7	100.059	53.836	1.94736	13.8603	12.2629	0.196153	4.86272	8.41327	3.03555	1.1093	0.319147		15.8408	33.2959	37.2309	320.145	496.715	28.0493	308.643	164.865	34.5067	11.5022	21.5919	30.3699	120.773	6.45739	19.0695	43.7892	2.52242	26.3341	1.00897		99.8426	0.216532	100.059
100924-1559MS-b	10MS312	BL-3	3	7	99.6286	53.6099	1.93634	13.8782	12.1326	0.195518	4.84713	8.37401	3.02171	1.10126	0.317515		15.9939	33.2955	36.5144	319.979	489.072	27.2601	308.009	163.661	35.7097	11.8697	20.0176	30.0766	121.011	4.82835	17.8046	40.8398	3.72186	24.4435	0		99.4142	0.214345	99.6286
100924-1742MS	10MS141	BL-4	3	8	99.8844	53.7811	1.87619	13.9762	12.0624	0.197794	4.85947	8.64925	3.00164	0.971606	0.297114		14.597	35.9388	37.8515	319.523	468.111	21.9458	314.691	160.668	33.6234	12.1809	20.8385	33.4221	117.783	3.82542	18.4224	39.2609	3.32208	22.8519	1.00669		99.6727	0.211713	99.8844
100924-1742MS-a	10MS313	BL-4	3	8	99.6143	53.8698	1.88463	13.9625	11.721	0.194162	4.84312	8.65422	2.99271	0.983972	0.295076		16.0356	35.8028	37.8199	324.747	465.436	23.1962	314.762	159.65	33.2815	11.4972	20.3723	33.3823	116.989	5.04265	21.6834	43.5685	3.52985	23.7004	0.907677		99.4012	0.213196	99.6143
100925-1125MS	10MS142	BL-5	3	9	100.041	53.464	1.80981	14.0844	11.911	0.203647	5.21418	8.86331	2.88042	1.1205	0.280122		15.0931	40.0817	37.5829	325.152	451.294	26.288	316.256	153.03	31.9854	10.5952	20.1908	32.7851	115.547	4.398	20.7905	36.4834	3.19854	20.3907	2.29895		99.8313	0.209879	100.041
100925-1125MS-a	10MS314	BL-5	3	9	100.06	53.5865	1.82437	14.0606	11.8056	0.203641	5.22447	8.89505	2.84723	1.12351	0.28066		17.2356	40.8845	37.1768	323.469	447.525	25.3524	318.659	152.916	32.4671	11.3234	20.4423	31.3648	112.032	5.91222	15.0311	36.776	3.50725	20.4423	0		99.8517	0.2086	100.06
100925-1302MS	10MS143	BL-6	5	15	94.0032	52.31	1.73783	14.1545	8.40764	0.159685	4.17661	8.35494	2.77266	1.39422	0.309868		10.4647	37.522	34.6937	295.274	596.675	33.1853	322.802	161.684	35.2594	10.7475	20.5523	25.5489	114.923	6.97645	22.2492	48.3638	3.77106	27.2459	1.13132		93.778	0.225153	94.0032
100925-1302MS-a	10MS315	BL-6	5	15	94.1614	52.4701	1.73544	14.1577	8.38765	0.156509	4.19613	8.38112	2.75826	1.38378	0.308858		13.2956	40.9316	34.9486	290.225	602.673	33.524	326.978	162.397	35.8033	11.3013	20.5133	27.2561	118.046	5.31826	19.8485	42.5461	4.17863	23.0774	1.80441		93.9355	0.22581	94.1614
100930-1545MS	10MS144	BL-8	5	15	98.7662	53.6887	1.75142	14.1365	10.9066	0.197081	4.66842	8.58555	2.86895	1.42331	0.320595		12.1967	36.1934	36.2926	303.529	534.473	33.7144	317.808	165.102	33.1195	10.7093	19.5345	28.3598	115.72	6.84205	21.5177	45.812	3.37144	24.9883	2.67732		98.5471	0.219108	98.7662
100930-1545MS-a	10MS145	BL-8	5	15	98.272	53.6025	1.75574	14.1307	10.6279	0.193672	4.60653	8.50434	2.87076	1.43602	0.324065		14.33	37.1011	35.3344	307.311	535.414	32.9787	318.107	165.679	33.3713	11.9744	19.2376	26.5989	115.916	6.08536	23.9488	43.1864	5.0057	24.4396	0.196302		98.0522	0.219766	98.272
100930-1545MS-b	10MS316	BL-8	5	15	98.6993	53.6087	1.75054	14.1376	10.9611	0.200072	4.66518	8.57028	2.84497	1.42038	0.320328		15.8937	38.7409	36.1582	303.868	534.824	33.5755	318.967	164.202	33.3768	11.6223	20.2645	29.006	117.216	5.16546	18.2778	47.0851	4.47011	24.7346	1.98671		98.4792	0.220163	98.6993
070921-1455-MS	07MS023	CT-1	1	2	95.7287	52.8194	1.95517	13.8476	9.43926	0.194473	4.30706	8.33222	2.9423	1.36137	0.305104		13.4904	20.7619	36.1659	338.122	513.88	31.7647	328.841	161.215	37.888	11.1942	21.5273	27.6506	143.611	6.69738	19.9008	48.8909	3.34869	25.5457	1.62651		95.5039	0.2248	95.7287
070913-1726-MS	07MS009	CT-2	3	7	90.9748	50.8279	1.98647	13.7966	8.24358	0.188873	3.63439	7.83138	2.7188	1.20552	0.318389		19.7242	32.9044	37.1442	318.168	526.47	28.2038	312.546	167.471	40.6466	11.7977	21.5676	27.5586	128.023	4.97714	23.8718	47.375	3.5946	25.07	0.737353		90.7518	0.222975	90.9748
070915-1604-MS-a	07MS010	CT-3a	3	7	53.2172	24.938	1.97268	13.819	11.3238	0.0306006	0.474806	0.305152	0.0247753	0.033753	0.130668		11.0723	30.8192	34.416	230.192	438.945	3.38518	18.4069	162.912	63.4721	11.1429	20.9458	27.7161	142.953	3.87885	32.9349	14.6691	3.66727	41.8916	0.916819		53.0533	0.163838	53.2172
070915-1604-MS-c	07MS012	CT-3b	3	7	92.0356	51.4337	1.97234	13.8196	8.23938	0.163665	3.52542	8.10093	2.85547	1.33972	0.330514		11.3282	32.8703	36.9559	315.889	800.03	34.6346	339.289	165.373	36.6773	11.5139	22.5635	31.2918	125.817	4.45699	23.9563	42.2486	2.97133	25.9063	1.76423		91.7807	0.254909	92.0356
070915-1822-MS	07MS014	CT-3c	3	7	96.8071	52.6986	2.00119	13.7726	10.7378	0.206601	3.93416	8.5485	2.93152	1.40504	0.339737		12.663	32.9626	37.3125	320.056	604.83	30.836	322.569	168.776	36.1525	12.1797	19.9129	29.966	126.147	5.7032	20.3962	44.949	3.18993	22.8128	1.73996		96.5758	0.23129	96.8071
070915-1604-MS-d	07MS013	CT-3d	3	7	98.8337	53.3307	1.98271	13.8027	12.036	0.198441	4.40819	8.4399	2.85802	1.22414	0.331985		17.9521	33.1117	37.3005	319.448	506.649	28.4242	316.057	165.459	36.7021	11.3697	21.2433	43.5838	126.363	4.48803	20.5452	40.5918	3.69016	25.6316	0.398936		98.6128	0.220904	98.8337
070915-1604-MS-b	07MS011	CT-3e	3	7	99.2073	53.5753	1.98928	13.792	12.3604	0.196705	4.35389	8.42989	2.83475	1.10817	0.333149		13.6796	34.1991	38.3231	324.992	592.248	31.5839	323.785	167.374	44.1571	11.2656	21.7265	30.3768	131.868	5.53221	23.1347	45.2635	2.71581	27.1581	2.01171		98.9735	0.23383	99.2073
070919-1825-MS	07MS022	CT-4	3	7	98.4487	52.8829	1.99114	13.7889	12.2044	0.204788	4.45616	8.51684	2.81498	1.01635	0.336368		16.2396	29.9884	37.4606	325.19	594.488	26.601	330.171	167.278	57.2868	11.6566	19.7266	29.8888	130.315	4.68258	26.5014	46.1284	3.88554	30.3869	1.09592		98.2128	0.235903	98.4487
070919-1453-MS	07MS021	CT-5	3	7	98.2831	52.972	1.99187	13.7878	11.5131	0.20296	4.3983	8.5432	2.96988	1.34215	0.34074		14.195	33.3828	37.3966	324.724	515.329	30.2501	315.228	166.914	36.3197	11.8455	20.7541	30.348	124.329	4.40536	20.1667	44.2494	3.62218	26.4321	1.27266		98.0619	0.221145	98.2831
070917-1630-MS	07MS016	CT-6	3	7	99.9592	53.5582	1.98496	13.799	12.3135	0.213732	4.74521	8.50021	3.00246	1.28545	0.338496		14.5213	33.3195	37.9941	319.966	500.289	28.7443	312.109	166.796	35.6071	11.637	22.0804	28.8437	123.133	5.3709	19.6933	44.2602	3.97844	24.5669	1.09407		99.7413	0.217914	99.9592
070916-1811-MS	07MS015	CT-7	3	7	100.079	53.9304	1.95891	13.8415	12.1959	0.215694	4.7216	8.53748	3.08846	1.04414	0.329407		16.0868	30.766	37.5023	318.317	498.289	22.9237	313.19	164.89	35.9942	11.3613	20.7118	29.0568	120.852	6.03255	20.209	45.6463	2.31248	20.9128	1.10597		99.8634	0.215689	100.079
070908-1545-MS	07MS001	CT-8	5	13	96.0728	53.3976	1.80844	14.0606	9.36874	0.181957	4.0751	8.22024	2.91727	1.47042	0.343921		8.8965	36.16	34.5337	301.333	609.554	35.3947	317.213	167.216	36.0643	10.8097	20.8542	27.8374	121.394	6.21798	24.6806	48.2133	3.53947	24.298	1.2436		95.8443	0.228458	96.0728
090921-1102MS	10MS071	DH-1	1	1	100.002	53.9237	2.0765	13.6499	12.6693	0.213792	4.38648	8.15246	3.0698	1.29476	0.340993		10.8529	17.4853	34.5686	349.404	522.347	33.1617	325.788	170.23	35.1715	12.4608	21.3039	24.0171	126.014	6.63234	21.5049	48.1347	5.12499	25.1225	1.80882		99.7777	0.224776	100.002
090921-1102MS-a	10MS079	DH-1	1	1	99.8624	53.9255	2.07631	13.6502	12.5614	0.213061	4.37117	8.14964	3.0578	1.28865	0.343682		10.8792	16.3188	36.9691	349.142	521.597	33.9471	325.772	170.34	35.3574	12.3902	20.7511	24.8811	127.629	5.64107	23.6723	45.1286	4.63374	24.176	3.42493		99.6374	0.224992	99.8624
090921-1238MS	10MS072	DH-2	1	2	100.119	53.9054	2.02678	13.7309	12.53	0.210563	4.54977	8.3295	2.97029	1.32156	0.32442		11.6344	18.6552	36.9092	344.72	496.769	34.6024	323.657	167.596	34.4018	12.3365	20.4605	24.9739	126.875	5.01483	20.962	42.4255	4.91454	22.7673	2.00593		99.8991	0.220193	100.119
090921-1238MS-a	10MS080	DH-2	1	2	100.239	53.9188	2.02346	13.7363	12.6564	0.210877	4.564	8.30443	2.96979	1.31187	0.323779		11.0197	18.7335	36.866	341.912	488.474	35.0628	323.078	166.799	33.7604	12.3221	21.7389	25.5457	125.324	6.11094	19.2344	48.7873	4.60825	24.043	1.90341		100.02	0.219421	100.239
090921-1554MS	10MS073	DH-3	3	8	100.155	53.5277	1.87855	13.9724	12.2115	0.207567	5.04234	8.84391	2.8765	1.08151	0.29946		16.7762	36.8059	36.3992	322.916	458.854	26.8419	318.137	162.271	33.9591	11.9975	20.4364	33.2473	121.195	4.677	19.9281	40.9745	3.45691	23.385	1.42343		99.9414	0.213487	100.155
090921-1554MS-a	10MS331	DH-3	3	8	100.164	53.5342	1.88215	13.9665	12.203	0.206976	5.04915	8.87249	2.86246	1.07616	0.299353		15.3039	37.3537	37.253	318.161	456.299	26.9833	315.745	162.705	33.7291	11.2766	20.3381	32.6216	118.505	4.93351	19.0292	36.951	3.92667	23.8621	1.51026		99.9525	0.211305	100.164
090921-1719MS	10MS074	DH-4	4	12	98.6235	53.115	1.76904	14.1508	11.2334	0.188449	4.89595	8.8879	2.86739	1.01614	0.285273		17.4965	42.1324	36.7024	327.205	464.864	25.4403	326.702	153.949	32.8814	10.7593	19.7087	30.3675	117.548	6.13383	18.4015	43.339	5.12829	20.5131	0		98.4094	0.214182	98.6235
090921-1819MS	10MS075	DH-5	5	16	100.025	53.8162	1.72125	14.1766	11.6989	0.201113	5.08159	8.69236	2.98273	1.12948	0.309148		15.8594	41.1541	35.5331	303.838	514.627	28.306	318.392	158.092	32.5218	10.7402	20.1755	26.7	116.837	4.81804	17.365	45.1691	3.41278	23.488	1.50564		99.8094	0.215406	100.025
090921-1819MS-a	10MS332	DH-5	5	16	99.8995	53.7668	1.71873	14.1799	11.6616	0.200999	5.04532	8.69924	2.97244	1.12895	0.309609		14.6824	40.4515	34.1591	301.938	522.774	28.2661	318.319	158.51	33.2601	11.0867	21.2745	27.2673	115.062	5.39354	19.2769	43.7476	2.99641	24.9701	0.799043		99.6835	0.215916	99.8995
080531-1610MS	08MS018	PG-1	1	3	98.5416	53.2266	1.89946	13.9383	11.5141	0.187792	4.6663	8.76832	2.86079	0.993817	0.274594		14.6477	24.9814	37.3216	332.684	456.387	25.3827	323.955	153.701	35.315	11.7382	21.0686	32.3052	115.376	6.62157	18.4601	40.833	3.61176	22.1722	2.30752		98.33	0.211533	98.5416
090616-1816MS-a	10MS042	PG-2	1	3	96.692	53.4019	1.88493	13.962	9.18974	0.190034	4.72004	8.71772	2.81162	1.29994	0.283206		14.5474	27.3374	36.9055	322.484	625.832	28.509	329.123	158.557	36.0268	12.9853	20.796	32.0238	117.063	6.73672	18.1599	41.5919	2.63611	20.8936	0.585802		96.4611	0.230855	96.692
090616-1816MS-b	10MS043	PG-2	1	3	97.3146	53.3308	1.87179	13.9834	10.0563	0.187336	4.58181	8.73557	2.81093	1.26158	0.27664		16.3942	26.9965	37.206	329.553	508.417	28.3708	326.314	155.892	34.9481	11.5839	19.8301	36.028	115.839	6.18464	19.732	41.5255	2.8469	22.3825	0.883521		97.0961	0.218539	97.3146
080531-1715MS	08MS019	PG-3	1	3	98.4926	52.9061	1.92594	13.8952	11.8804	0.178747	4.66757	8.90087	2.81098	0.846884	0.273401		15.3487	24.8019	39.1342	336.961	422.04	20.2278	322.832	151.353	33.9502	11.5878	20.736	33.442	114.556	4.67577	21.8542	36.7963	2.84612	20.736	0.101647		98.286	0.20665	98.4926
090617-1010MS	10MS045	PG-4	4	11	97.1191	52.6515	1.77557	14.1401	10.539	0.178742	4.60423	8.90299	2.88289	0.961944	0.270468		17.7985	48.1837	37.662	321.749	446.732	21.5352	315.062	154.876	33.8269	12.1934	21.8302	39.5303	112.199	4.72004	19.7652	39.3336	2.55669	23.7969	1.27834		96.9075	0.211585	97.1191
090616-1909MS	10MS044	PG-5	4	11	95.0275	51.9351	1.77579	14.1398	9.07972	0.174211	4.75435	8.86284	2.82053	0.997874	0.267132		18.3006	48.5782	37.5594	325.675	509.831	22.8998	325.1	151.1	32.6729	10.6355	20.0253	39.7632	116.128	5.84471	18.9713	39.6674	2.77863	22.8039	2.29956		94.8073	0.220136	95.0275
100927-1642MS	10MS104	SG-1	1	2	100.179	53.8669	1.98352	13.8014	12.5504	0.207476	4.64243	8.49665	2.95156	1.15193	0.310474		12.5706	18.2477	36.2926	343.158	468.053	31.5279	327.242	164.432	34.2651	11.5569	20.1738	26.7633	120.84	5.57568	20.6807	47.0385	3.95366	27.9798	1.41926		99.9627	0.216715	100.179
100927-1642MS-b	10MS114	SG-1	1	2	99.8512	53.9066	1.9978	13.7781	12.3245	0.207552	4.5524	8.39579	2.96014	1.19936	0.313376		11.1415	18.9706	35.9337	338.761	476.875	32.3203	321.396	164.111	33.4244	11.0411	20.7773	25.9967	122.054	5.82166	17.8665	45.1681	4.71756	26.2979	0.802988		99.6356	0.21552	99.8512
100927-1642MS-a	10MS283	SG-1	1	2	100.25	53.8948	1.98928	13.792	12.6083	0.208087	4.62823	8.46776	2.96356	1.16938	0.312741		11.4084	19.8889	36.3452	342.453	466.733	32.6098	323.977	164.159	33.9222	11.4084	20.7976	26.1484	125.492	5.75466	17.8697	44.0181	3.63452	22.7158	3.73548		100.034	0.215704	100.25
100928-1505MS	10MS105	SG-2	3	8	99.5688	53.5428	1.89451	13.9464	11.9586	0.203619	4.81736	8.62931	3.01036	1.05212	0.302009		16.6438	35.4059	37.4233	324.907	471.574	26.2266	310.785	160.486	33.2876	11.4993	20.376	31.2701	117.213	4.2366	16.3412	37.3224	2.72353	21.3847	0.100871		99.3571	0.211671	99.5688
100928-1505MS-a	10MS284	SG-2	3	8	99.6147	53.5268	1.88742	13.9579	11.9911	0.200313	4.85219	8.62125	3.01169	1.05497	0.299527		16.0491	35.7093	36.6121	317.773	470.841	25.7789	309.648	159.187	32.8004	11.2344	21.0645	31.5967	116.657	5.81781	19.4596	41.5271	3.51075	24.0737	0.100307		99.4032	0.211445	99.6147
110502-1242MS	10MS113	SG-2	3	8	98.986	53.1332	1.8949	13.9457	11.8251	0.204842	4.78284	8.77012	2.89026	1.01815	0.308398		15.8009	35.6021	36.8021	319.018	464.927	25.4015	314.918	158.709	32.8019	11.2006	21.3012	30.7018	121.007	4.50026	18.8011	47.2027	3.5002	23.3013	1.90011		98.7735	0.212509	98.986
110502-1242MS-a	10MS293	SG-2	3	8	99.4265	53.3551	1.917	13.9097	11.9992	0.207498	4.86186	8.73857	2.84647	1.06712	0.311748		14.3386	33.8911	38.9046	319.86	453.82	28.1758	315.549	162.136	34.6933	11.7315	21.4577	30.3817	120.524	5.91591	19.0512	42.9154	3.40917	24.6663	1.90512		99.2143	0.212161	99.4265
100927-1823MS	10MS106	SG-3	3	9	99.1346	53.0698	1.83702	14.04	11.7761	0.202742	5.03931	8.90701	2.77997	0.989769	0.284433		16.7514	40.2235	36.3115	322.39	423.901	25.6788	316.472	154.775	32.7004	10.9336	20.6634	34.0044	116.558	5.11571	22.3687	42.7312	2.70831	23.4721	1.90585		98.9262	0.208417	99.1346
100927-1823MS-a	10MS285	SG-3	3	9	98.9831	52.9899	1.83241	14.0475	11.5989	0.203725	5.12149	8.95498	2.77643	0.965904	0.283997		17.9542	41.0238	36.7108	318.762	420.569	25.3766	316.455	155.67	32.3978	10.933	20.6623	33.0999	113.342	5.11543	23.5711	43.732	3.8115	23.5711	1.80545		98.7753	0.207766	98.9831
100928-1808MS	10MS107	SG-4	4	10	100.052	53.6397	1.83646	14.0409	11.9051	0.205089	5.00401	8.73651	2.90108	1.2471	0.319571		18.006	42.5777	37.0068	308.39	487.455	31.2369	311.175	162.551	33.7239	11.5397	20.1946	33.8234	118.382	5.37195	19.1003	47.2533	3.78026	25.3675	2.18857		99.8355	0.216027	100.052
100928-1808MS-a	10MS286	SG-4	4	10	100.154	53.6259	1.83281	14.0469	12.0314	0.204231	4.99499	8.73669	2.89949	1.24543	0.321348		16.9561	40.7943	36.7049	305.01	486.939	32.0171	311.194	162.379	34.4109	11.3705	20.5468	37.0042	118.294	3.88992	20.846	41.4925	3.29147	23.938	1.39638		99.9391	0.214621	100.154
100928-1840MS	10MS108	SG-5	4	10	99.4731	53.3781	1.81797	14.0711	11.8258	0.190895	4.98378	8.81075	2.825	1.06975	0.287631		18.3262	41.3851	34.2358	325.341	455.236	27.3887	313.761	159.096	33.2289	11.177	19.6353	35.9476	114.891	5.33676	19.2325	42.1906	3.72567	22.4547	0.805549		99.2608	0.212316	99.4731
100928-1840MS-a	10MS287	SG-5	4	10	100.02	53.545	1.83118	14.0496	12.0843	0.193403	5.06794	8.87124	2.82057	1.05659	0.286826		17.5103	42.8143	36.0329	325.713	454.459	28.3404	313.972	160.124	32.4903	12.2471	20.142	37.3487	114.576	4.95958	18.2189	43.3204	3.74499	21.4578	2.32797		99.8066	0.213229	100.02
100928-1657MS	10MS109	SG-6	4	11	99.6782	53.3485	1.7846	14.1254	11.7308	0.195766	5.13883	8.99906	2.79985	1.06898	0.276915		18.3813	48.1129	36.9636	324.838	428.396	28.5262	309.57	155.187	32.1422	10.9485	19.9885	38.6711	112.397	4.01778	17.8791	41.9858	3.01334	21.696	3.31467		99.4687	0.209443	99.6782
100928-1657MS-a	10MS288	SG-6	4	11	99.3994	53.2197	1.77879	14.1349	11.609	0.195792	5.14297	9.00187	2.77791	1.05529	0.275455		17.8613	47.0615	36.8264	319.496	425.059	28.1968	308.76	153.527	31.9095	10.4358	21.6744	38.7329	113.389	4.91687	18.4634	38.6326	4.11412	22.2764	1.8062		99.1917	0.207723	99.3994
110430-1712MS	10MS112	SG-7	4	12	99.9183	53.5011	1.79619	14.1066	11.8517	0.187009	5.21483	8.9739	2.75623	1.03999	0.280809		18.3442	44.2299	37.096	329.074	428.948	26.1914	313.89	155.11	32.0004	10.5989	20.3824	35.1597	116.282	4.38222	19.0576	39.8477	4.68796	23.3379	1.63059		99.7083	0.209961	99.9183
110430-1712MS-a	10MS292	SG-7	4	12	99.9557	53.5359	1.7937	14.1106	11.8666	0.187657	5.2007	8.9842	2.75625	1.03279	0.278889		16.6987	43.7832	36.5539	326.439	429.381	25.8626	312.897	155.889	31.6664	11.3022	18.837	36.1466	113.124	4.48014	19.3461	40.0158	2.851	21.8916	1.32368		99.7473	0.20845	99.9557
100928-1248MS	10MS110	SG-8	5	13	100.164	54.4674	1.82747	14.0353	11.8444	0.199595	4.58672	8.37299	2.95426	1.28675	0.367669		13.6391	34.0471	33.8451	295.715	551.725	35.6636	318.043	172.66	36.1688	12.3257	21.0143	25.4596	120.832	6.87004	21.5194	44.9584	5.15253	24.1462	1.71751		99.9425	0.221629	100.164
100928-1248MS-a	10MS289	SG-8	5	13	99.9037	54.3426	1.8162	14.0503	11.7324	0.198038	4.58583	8.36954	2.95176	1.27144	0.365795		12.7423	35.6183	34.7153	294.277	544.408	35.0163	315.147	171.47	34.8156	11.9397	19.9663	25.7857	119.497	6.72233	20.769	44.849	4.41466	25.7857	1.00333		99.684	0.219693	99.9037
100928-1248MS-b	10MS290	SG-8	5	13	99.7012	54.305	1.81548	14.0512	11.5906	0.198335	4.57591	8.34026	2.94535	1.29153	0.367157		13.6074	33.8673	33.5649	296.238	542.783	35.984	314.885	171.655	35.2784	11.5915	19.2519	27.114	121.055	5.94693	21.671	47.777	4.13261	26.106	2.01591		99.4809	0.220349	99.7012
100928-1102MS	10MS111	SG-9	5	14	100.046	54.9284	1.74411	14.1462	11.1395	0.207898	4.68007	8.29163	2.97865	1.38853	0.31681		16.4791	38.0827	34.7668	295.92	565.212	37.0779	309.385	173.332	37.2789	11.8569	20.0964	27.6326	122.186	6.22989	21.9051	47.3271	4.62218	27.8336	0.803857		99.8218	0.224406	100.046
100928-1102MS-a	10MS291	SG-9	5	14	100.125	54.9979	1.73698	14.1557	11.1052	0.206748	4.71372	8.31244	2.97204	1.3832	0.31759		15.0369	37.0911	33.1815	297.731	566.692	37.7928	310.262	172.524	35.6877	11.8291	19.4478	28.2695	118.291	7.21773	20.8512	45.9128	5.01231	25.9638	2.30566		99.9014	0.223442	100.125
080602-1824MS	09MS009	WC-1	3	9	98.7887	52.9817	1.82745	14.0556	11.1848	0.257941	4.49584	9.51949	2.87047	1.08261	0.294835		17.7905	38.2091	36.9962	326.294	504.199	26.0793	323.16	158.194	33.155	11.5234	20.6208	31.5377	115.638	6.57036	16.9818	40.8373	3.03247	22.3392	0		98.5708	0.217896	98.7887
080722-1922MS	09MS010	WC-2	3	9	98.4128	53.0102	1.80829	14.0868	11.1658	0.198743	4.76716	8.84282	2.9833	1.04416	0.290996		19.0142	38.327	37.6301	321.648	471.472	26.0823	321.947	157.887	33.2499	12.1452	19.711	31.7566	115.877	5.77393	20.5074	42.8068	2.09056	22.4984	2.98652		98.1983	0.21449	98.4128
110428-1137MS	10MS244	WW-1	3	8	99.7664	53.6617	1.86205	13.9993	11.96	0.191489	5.18513	8.36994	2.97922	1.05363	0.292243		16.8177	37.8905	36.5735	317.916	467.857	25.9358	304.846	156.932	33.6354	11.4482	19.8571	31.8118	119.953	4.76164	20.5662	43.26	3.34328	24.9226	3.34328		99.5546	0.211765	99.7664
110428-1137MS-a	10MS248	WW-1	3	8	99.9816	53.7874	1.86627	13.9924	12.0182	0.191753	5.19829	8.40339	2.96718	1.05207	0.293174		16.2751	35.2795	36.8969	319.942	468.136	25.8784	307.407	157.798	34.0665	10.412	20.6218	30.6295	116.655	5.05437	18.6001	43.6698	4.8522	26.1817	1.31414		99.7701	0.211504	99.9816
06BV-G523	06BV-G523	WG-1	5	13	99.2573	53.9741	1.78476	14.0921	11.1584	0.200521	4.7906	8.37222	2.91633	1.41312	0.334461		15.3132	36.5475	35.935	307.898	547.09	33.7912	316.575	164.464	34.9141	10.413	19.703	24.0928	116.789	5.71693	20.6218	44	5.10441	25.9304	0		99.0366	0.2207	99.2573
97SH-X49A	97SH-X49A	SH-1	3	7	100.135	53.5621	1.97343	13.8178	12.4201	0.215868	4.86291	8.57211	3.00903	1.15109	0.331031		20.556	34.6945	37.9032	322.98	494.948	29.6808	317.866	166.152	35.998	13.3363	21.659	30.5833	123.637	5.01365	20.8568	38.1038	4.51229	23.3636	1.5041		99.9155	0.219236	100.135
99SH-X98	99SH-X98	SH-2	3	7	99.4464	53.2034	1.97367	13.8174	12.3414	0.210397	4.74078	8.55097	2.93292	1.13207	0.328387		20.9409	32.3003	37.6343	318.953	473.639	26.7688	316.484	165.848	35.56	12.2484	20.2494	29.4358	121.003	5.72911	20.8421	41.0915	4.04989	23.4103	1.778		99.2314	0.214953	99.4464
00SH-X111	00SH-X111	SH-3	3	7	99.4374	53.0717	1.97677	13.8124	12.5235	0.226047	4.65088	8.55198	2.9865	1.08033	0.338324		21.9149	33.118	36.9506	320.566	492.052	27.6147	320.468	167.752	36.7541	11.4979	21.9149	29.4819	124.413	7.9601	21.5218	40.0953	3.83264	23.6838	0.884456		99.2184	0.21901	99.4374
97LC-Q70	97LC-Q70	LC-1	5	13	99.8254	54.2865	1.81391	14.0533	11.4551	0.199845	4.67237	8.42972	3.07094	1.26541	0.354536		21.1163	35.3253	35.6214	301.844	552.575	32.5625	317.237	169.423	36.0161	12.4329	19.9322	26.642	122.356	7.00586	19.3401	50.0278	3.74962	26.938	0		99.6017	0.223711	99.8254
00LC-Q447	00LC-Q447	LC-2	5	13	100.073	54.4444	1.81414	14.053	11.5316	0.204895	4.70132	8.43994	3.03902	1.26945	0.349012		22.0562	36.8921	36.002	304.434	561.888	34.914	318.479	170.515	34.6173	12.1655	21.2649	27.5949	120.963	9.29722	21.0671	46.2883	4.74751	23.6387	0.989066		99.8468	0.225827	100.073
T1248	10MS201	WV-01	3	7	99.4314	53.4382	1.99242	13.7869	11.9685	0.21593	4.79333	8.57763	2.98503	1.11894	0.336139		19.3206	34.2365	37.6402	324.646	491.525	27.8297	313.535	167.979	35.8382	12.5134	22.2237	30.1322	122.431	6.30673	18.1193	43.2461	2.20235	23.8254	2.30246		99.2129	0.218427	99.4314
T3407	10MS215	WV-02	3	7	94.9844	51.9309	1.99377	13.7847	9.82267	0.181162	4.10754	8.34609	2.88485	1.37239	0.334604		20.0058	33.2153	36.1827	323.538	517.757	30.248	322.294	169.427	37.5228	11.678	21.2501	30.4394	142.338	6.03045	20.5801	44.7019	4.0203	26.2277	1.72298		94.7587	0.225744	94.9844
T3421	10MS217	WV-03	4	10	97.3005	53.3021	1.83339	14.046	10.1015	0.184545	4.46212	8.62392	2.85601	1.37164	0.297105		21.2414	38.9588	36.9032	329.78	502.06	32.6941	318.816	162.981	35.4349	11.3548	21.535	32.792	124.512	6.65628	22.2202	42.0912	2.83871	23.8843	1.17464		97.0782	0.222276	97.3005
T3445	10MS220	WV-04	3	9	94.4593	52.1181	1.867	13.9912	9.1279	0.1519	4.25586	8.4641	2.98871	0.994317	0.288643		13.6388	37.9389	36.3061	309.178	467.369	23.1476	329.829	156.462	35.3456	10.7574	22.4752	30.4472	122.653	5.18659	20.7464	34.7694	2.30515	21.8029	1.34467		94.2477	0.211531	94.4593
070921-1250RW	07RW004	WV-05	3	8	99.6673	53.8719	1.90803	13.9243	11.7531	0.210181	4.6772	8.83997	3.02688	0.937058	0.302906		22.5276	36.5068	37.0096	324.639	471.873	18.8065	317.8	157.894	38.6188	11.0627	21.7231	33.4897	124.606	4.82735	18.002	43.949	2.91652	23.835	1.20684		99.4516	0.215675	99.6673
070924-1633RW	07RW006	WV-06	3	7	100.15	53.8489	1.98096	13.8055	12.4047	0.226193	4.64954	8.58621	3.09476	1.01015	0.328368		16.7172	33.034	36.2373	322.532	491.606	20.9215	314.323	163.668	34.5355	11.4117	21.6223	27.9287	121.125	5.10525	18.7193	40.3415	2.80288	23.1238	1.00103		99.9353	0.214743	100.15
070926-1227RW	07RW012	WV-07	3	7	96.9695	52.5777	1.98278	13.8026	10.8218	0.192331	4.28225	8.52553	2.91769	1.30916	0.332036		14.4917	34.5273	37.9314	319.985	554.576	29.3725	315.706	166.12	37.7368	11.7684	19.452	30.0533	125.757	4.96026	20.0355	45.8094	3.4041	27.2328	3.50136		96.7438	0.225655	96.9695
T2128	10MS206	AB-1	5	13	99.6167	54.1579	1.80648	14.0632	11.5032	0.197062	4.63019	8.43494	2.9654	1.28912	0.347794		15.6398	35.9513	35.8498	303.149	548.41	33.4124	316.758	168.788	35.6467	11.3744	19.9053	26.9127	119.533	6.195	18.2803	46.1071	3.55451	25.2878	0.81246		99.3952	0.22148	99.6167
T2152	10MS208	AB-2	5	15	99.8977	54.1517	1.73267	14.1614	11.6509	0.188997	4.74408	8.61577	2.98439	1.14047	0.308459		16.3563	38.1306	37.0061	309.542	527.081	26.6812	319.663	162.336	33.0192	11.7561	19.832	27.3968	115.312	6.44028	21.8765	45.3887	2.14676	25.1478	1.43117		99.6788	0.21886	99.8977

## Sheet: MI100
Supplemental File 2: Sheet MI100
MI100 Lines
	slope (m)	intercept (b)	MI window
MI100_Series I-IV	-1.6292	17.0329	0.5
MI100_Series V	-1.33021	16.4662	0.5
